# Supplementary material for: Host-induced spermidine production in motile Pseudomonas aeruginosa triggers phagocytic uptake
Source: eLife journal article supplement (doi:10.7554/elife.55744), 2020-09-22

**Figure 2\_ Negative Stain**

**CH2677:**

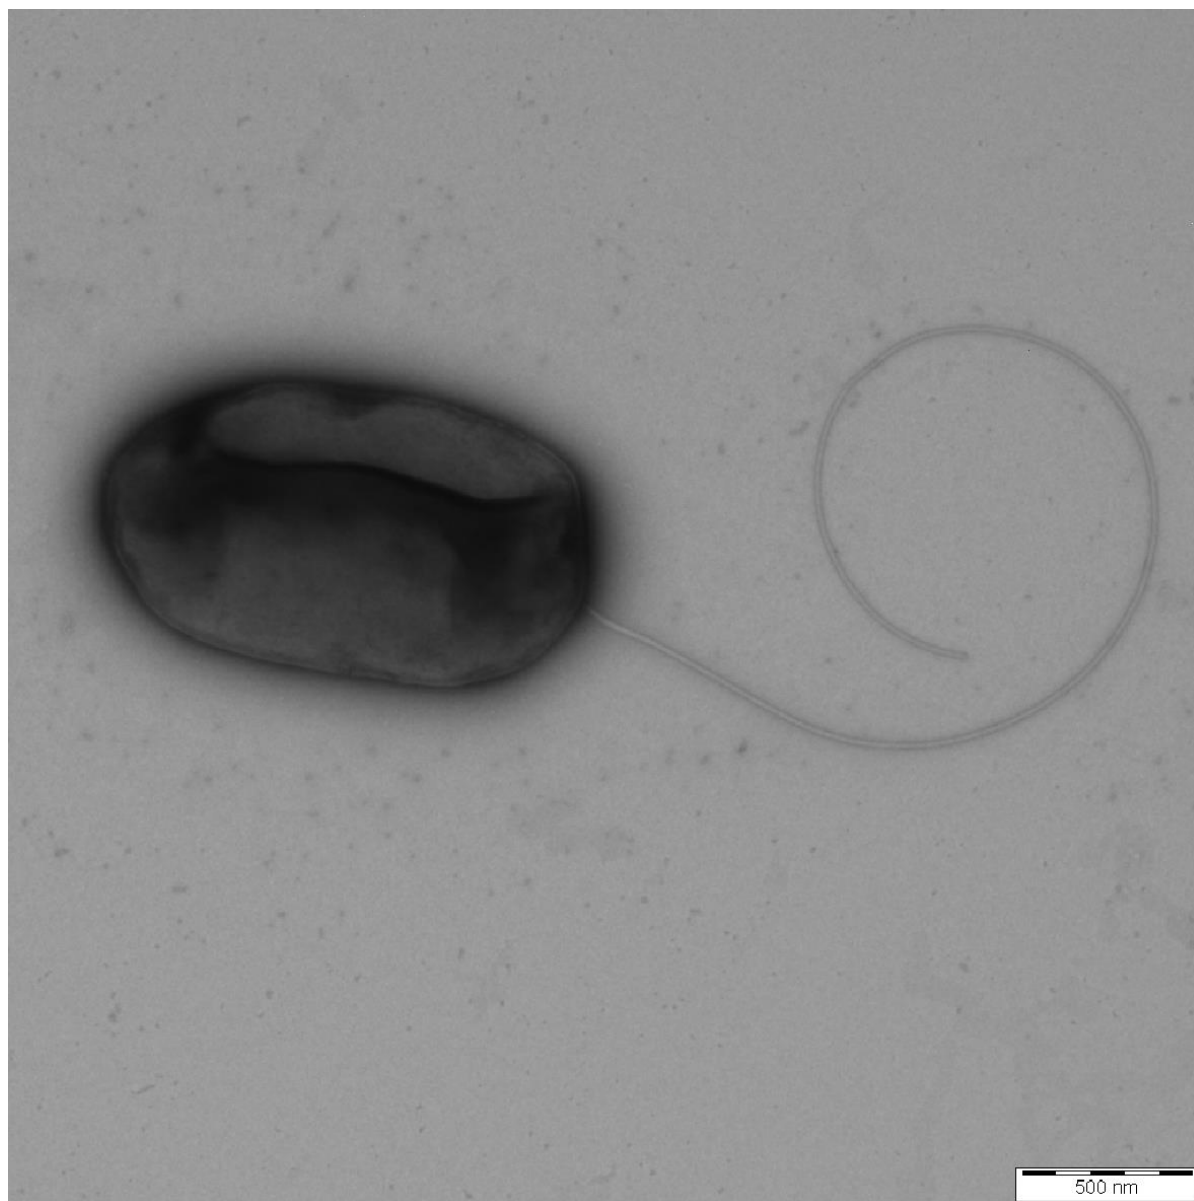

CH3797

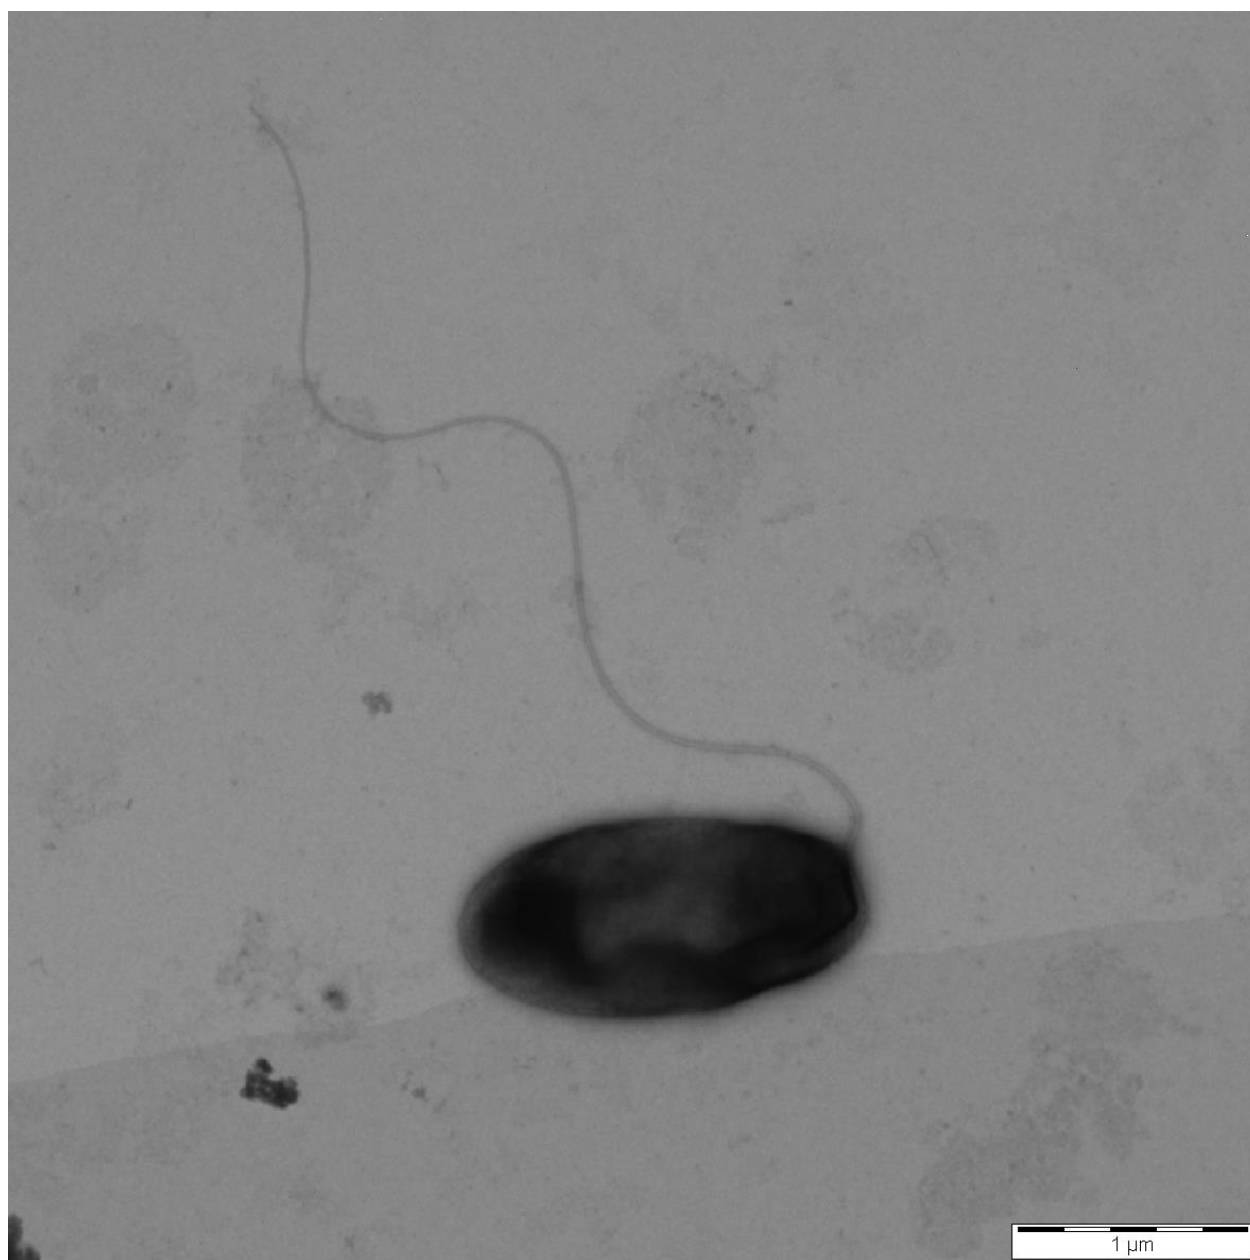

CH5528

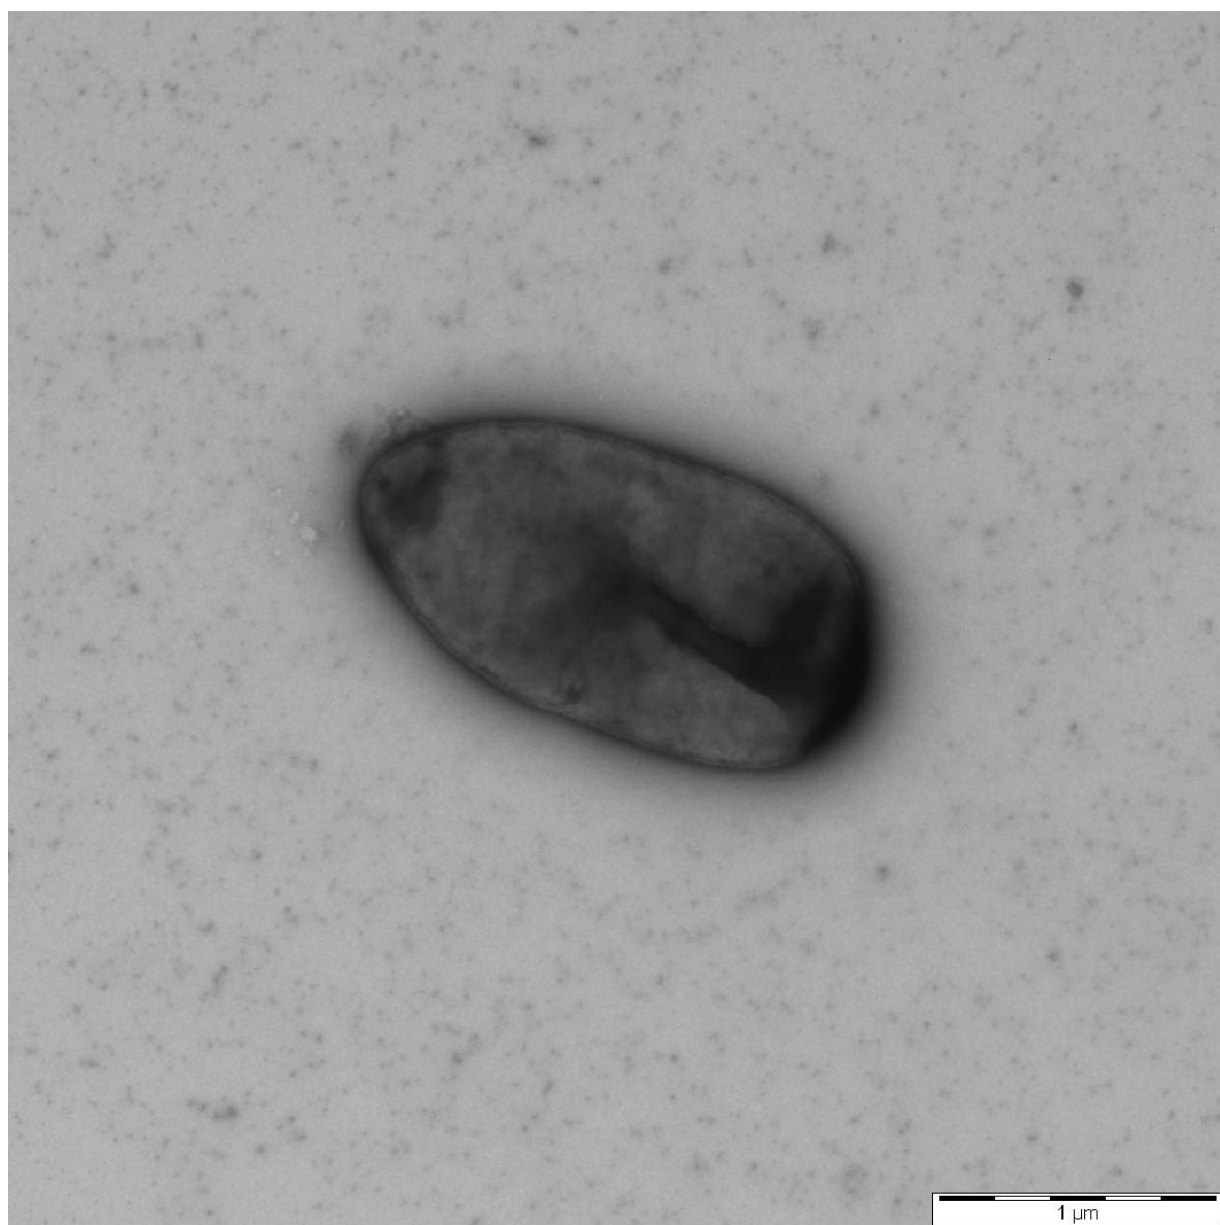

Supplement: fig2-data1 [file elife-55744-fig2-data1-v2.pdf]
