# Supplementary material for: Host-induced spermidine production in motile Pseudomonas aeruginosa triggers phagocytic uptake
Source: eLife journal article supplement (doi:10.7554/elife.55744), 2020-09-22
Supplement: supp [file elife-55744-supp-v1.zip]

Archive with 25 entries (25 files):
- elife_poa_e55744_Transparent_Reporting_File.pdf
- elife_poa_e55744_Figure_2_figure_supplement_1.tif
- elife_poa_e55744_Figure_2_figure_supplement_2.tif
- elife_poa_e55744_Figure_3_figure_supplement_1.tif
- elife_poa_e55744_Figure_3_figure_supplement_2.tif
- elife_poa_e55744_Figure_3_figure_supplement_3.tif
- elife_poa_e55744_Figure_3_figure_supplement_4.tif
- elife_poa_e55744_Figure_4_figure_supplement_1.tif
- elife_poa_e55744_Figure_6_figure_supplement_1.tif
- elife_poa_e55744_Figure_7_figure_supplement_1.tif
- elife_poa_e55744_Figure_7_figure_supplement_2.tif
- elife_poa_e55744_Figure_1_source_data_1.xlsx
- elife_poa_e55744_Figure_1_source_data_2.pdf
- elife_poa_e55744_Figure_1_source_data_3.pdf
- elife_poa_e55744_Figure_2_source_data_1.pdf
- elife_poa_e55744_Figure_3_source_data_1.xlsx
- elife_poa_e55744_Figure_3_source_data_2.csv
- elife_poa_e55744_Figure_4_source_data_1.csv
- elife_poa_e55744_Figure_4_source_data_2.xlsx
- elife_poa_e55744_Figure_4_source_data_3.xlsx
- elife_poa_e55744_Figure_4_source_data_4.xlsx
- elife_poa_e55744_Figure_5_source_data_1.xlsx
- elife_poa_e55744_Figure_6_source_data_1.csv
- elife_poa_e55744_Figure_6_source_data_2.xlsx
- elife_poa_e55744_Figure_3_figure_supplement_2_source_data_1.csv
