# Supplementary material for: Host-induced spermidine production in motile Pseudomonas aeruginosa triggers phagocytic uptake
Source: eLife journal article supplement (doi:10.7554/elife.55744), 2020-09-22
Supplement: supp [file elife-55744-supp-v1.zip › elife_poa_e55744_Figure_1_source_data_1.xlsx]

## Sheet: Table S3
Figure 1 - Source Data: Bacterial strains and plasmids used in this study
Strain	Description	Source	Ref.
Parental strains
PA14	Pseudomonas aeruginosa Wild-type PA14	Berwin Lab	-
Flagella mutants on Wt background
SH102	ΔfliC	-	Amiel et al., 2010
SH103	ΔflgK	-	Amiel et al., 2010
SH104	ΔmotAB ΔmotCD - denoted as ΔmotABCD	-	Amiel et al., 2010
Genetic complementation and control strains
SH709	pSEVA2513	This study	-
SH710	ΔfliC pSEVA2513	This study	-
SH711	ΔfliC pSEVA2513-fliC	This study	-
Spermidine mutants on Wt background
SH107	ΔPA14_63120	This study	-
Clinical Isolates
CH2677	-	Charité	Hornischer et al., 2019
CH3290	-	Charité	Hornischer et al., 2019
CH3797	-	Charité	Hornischer et al., 2019
CH4035	-	Charité	Hornischer et al., 2019
CH4433	-	Charité	Hornischer et al., 2019
CH4438	-	Charité	Hornischer et al., 2019
CH5334	-	Charité	Hornischer et al., 2019
CH5528	-	Charité	Hornischer et al., 2019
Plamids
pEX18-Gm	oriT, SacB, ColE1, GmR	-	Datsenko et al. 2000
pSEVA2513	oriT, PEM7, KmR	-	Lab collection
