# Supplementary material for: Host-induced spermidine production in motile Pseudomonas aeruginosa triggers phagocytic uptake
Source: eLife journal article supplement (doi:10.7554/elife.55744), 2020-09-22
Supplement: supp [file elife-55744-supp-v1.zip › elife_poa_e55744_Figure_1_source_data_2.pdf]

Figure 1B – Source File Scanning Electron microscopy

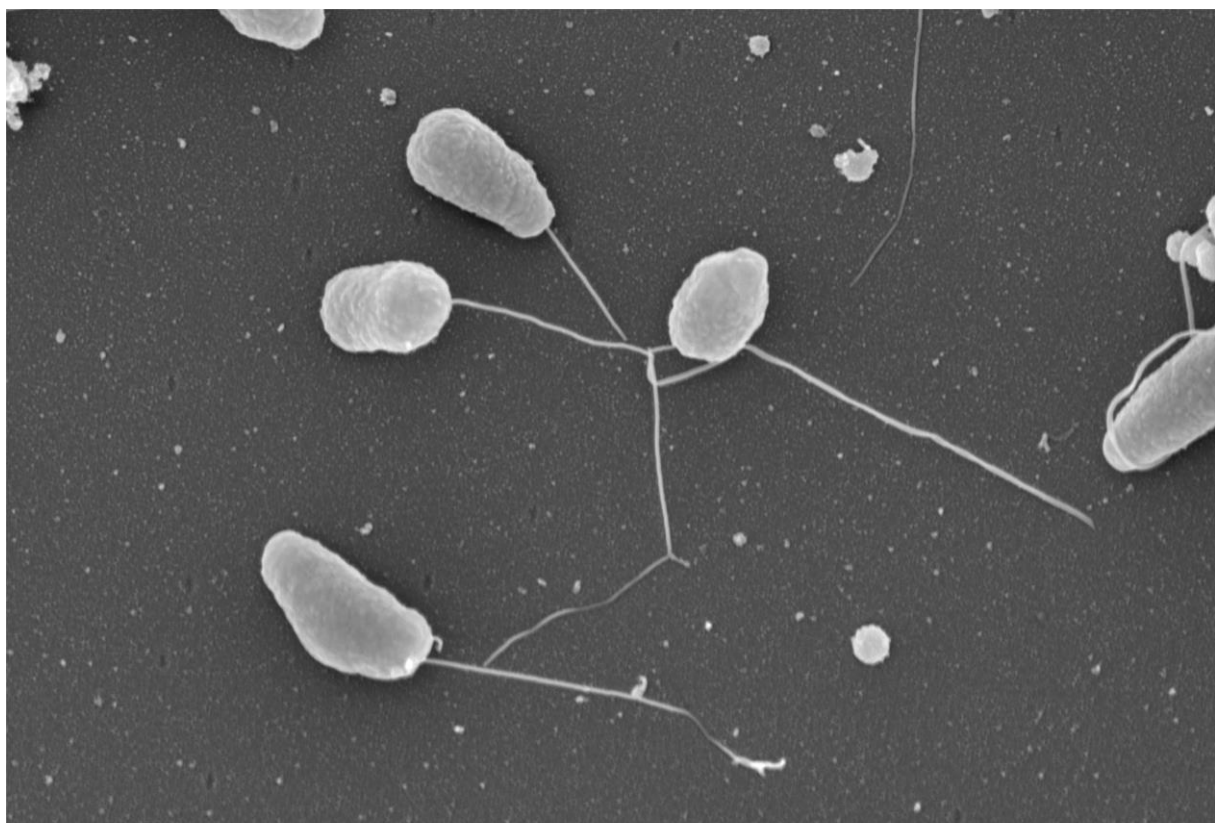

1  $\mu\text{m}$

Mag = 30.01 K X 6.833 nm  
EHT = 5.00 kV -0.0 °  
WD = 3.0 mm

Pseudomonas PA14 dmotABCD\_04.tif

25 Jan 2018

Signal B = InLens Mix Signal = 0.7500 Signal A = HE-SE2 ESB Grid = 0 V CC Pressure = 0.0 % M. Rohde, H Z I

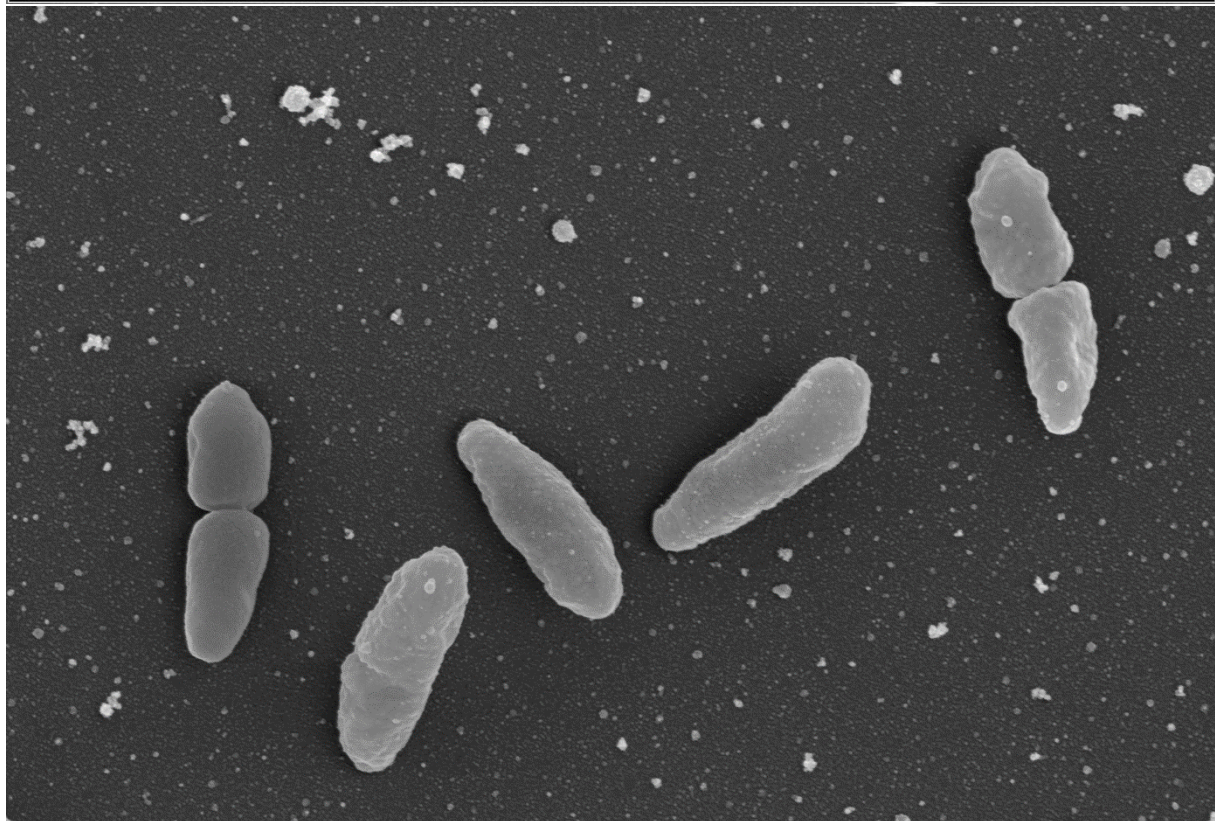

1  $\mu\text{m}$

Mag = 30.01 K X 6.833 nm  
EHT = 5.00 kV -0.0 °  
WD = 3.0 mm

Pseudomonas PA14 dflgk\_04.tif

26 Jan 2018

Signal B = InLens Mix Signal = 0.7500 Signal A = HE-SE2 ESB Grid = 0 V CC Pressure = 0.0 % M. Rohde, H Z I

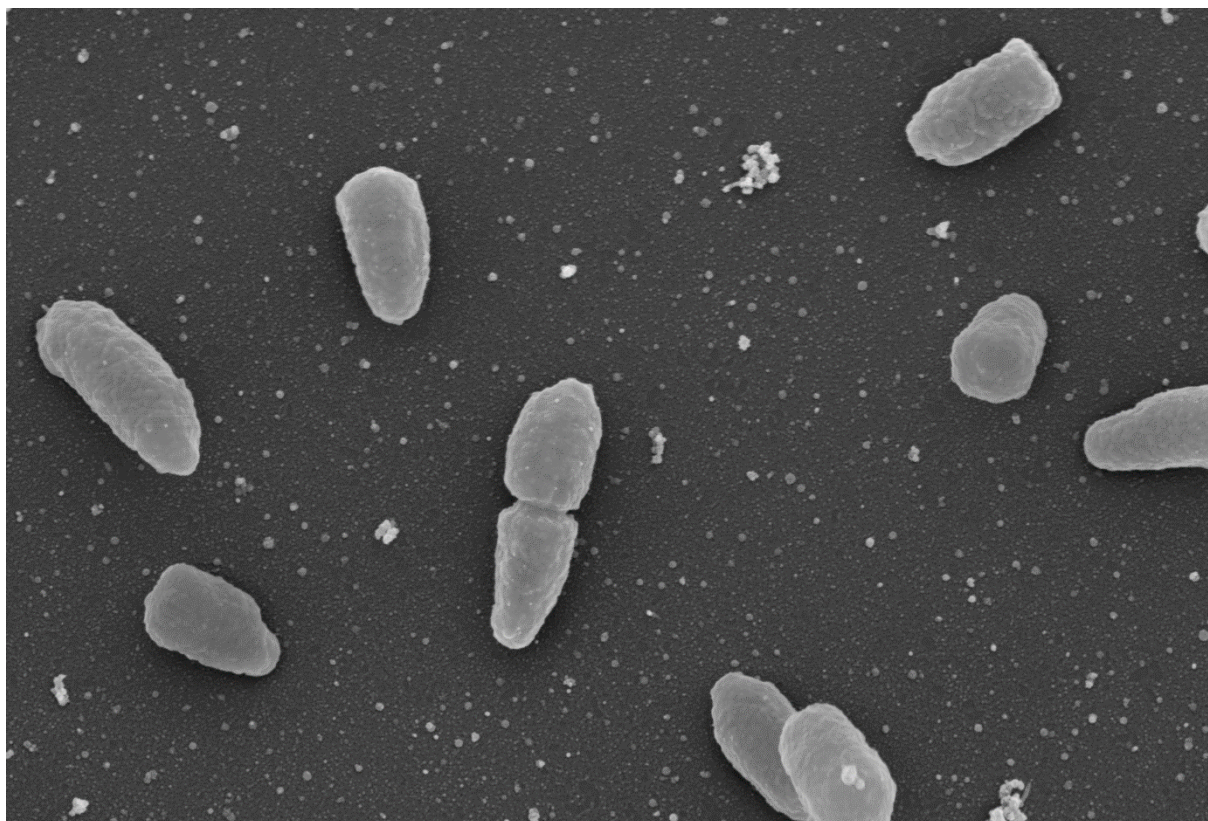

1 μm

Mag = 30.01 K X 6.833 nm  
EHT = 5.00 kV -0.0 °  
WD = 3.0 mm

Pseudomonas PA14 dfliC\_04.tif

25 Jan 2018

Signal B = InLens Mix Signal = 0.7500 Signal A = HE-SE2 ESB Grid = 0 V CC Pressure = 0.0 % M. Rohde, H Z I

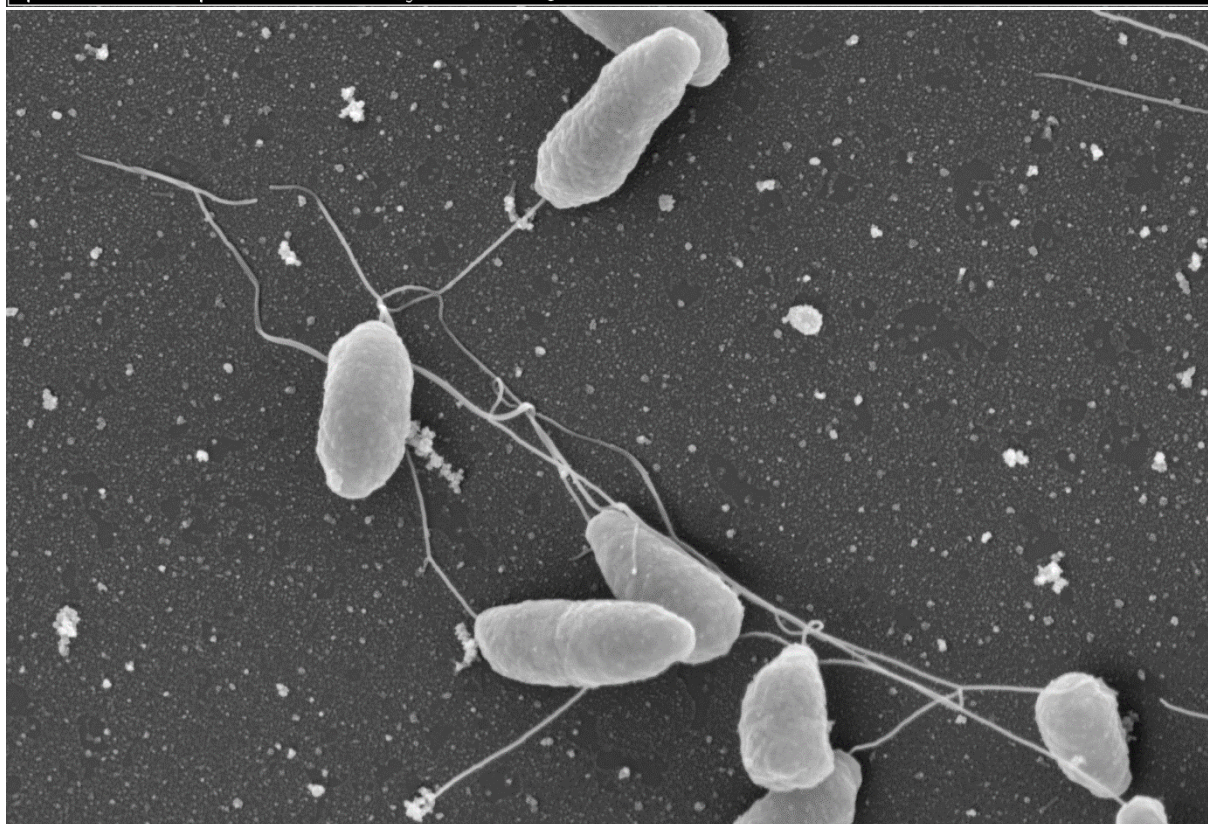

1 μm

Mag = 30.01 K X 6.833 nm  
EHT = 5.00 kV -0.0 °  
WD = 3.0 mm

Pseudomonas PA14 Wt\_04.tif

25 Jan 2018

Signal B = InLens Mix Signal = 0.7500 Signal A = HE-SE2 ESB Grid = 0 V CC Pressure = 0.0 % M. Rohde, H Z I
