# Supplementary material for: Host-induced spermidine production in motile Pseudomonas aeruginosa triggers phagocytic uptake
Source: eLife journal article supplement (doi:10.7554/elife.55744), 2020-09-22
Supplement: supp [file elife-55744-supp-v1.zip › elife_poa_e55744_Figure_1_source_data_3.pdf]

**Figure 1C\_Motility Plates**

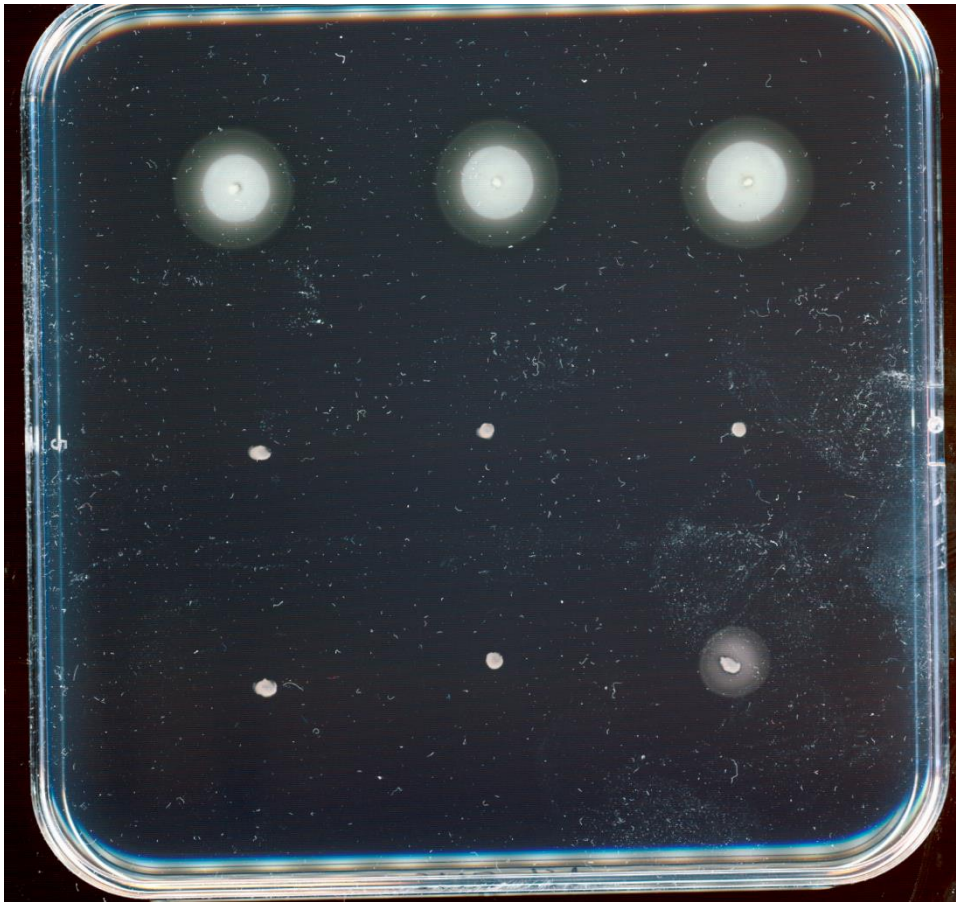

**Setup:**

**Upper lane: PA14 Wt**

**Middle lane: *DflgK*, *DfliC*, *DPA14\_42950***

**Bottom lane: *DmotABCD*, *DmotABCD*, *DpilA***
