# Supplementary material for: Host-induced spermidine production in motile Pseudomonas aeruginosa triggers phagocytic uptake
Source: eLife journal article supplement (doi:10.7554/elife.55744), 2020-09-22
Supplement: supp [file elife-55744-supp-v1.zip › elife_poa_e55744_Figure_3_figure_supplement_2_source_data_1.csv]

Figure 3 - Figure Supplement 4 - Source Data: Enriched functions in the Pseudomonas variants
	motABCD	fliC	flgK
pyoverdine biosynthetic process	26,52740341	88,79699248	83,31569665
response to stimulus	4,584983306	23,0214425	16,20027435
type IV pilus biogenesis	16,8810749	NA	39,76430976
type IV pilus-dependent motility	11,81675243	NA	19,88215488
protein secretion by the type III secretion system	8,738438772	NA	NA
C4-dicarboxylate transport	27,85377358	NA	NA
pathogenesis	3,823066963	NA	NA
protein transport	8,913207547	NA	NA
negative regulation of bacterial-type flagellum-dependent cell motility	18,56918239	NA	NA
beta-L-Ara4N-lipid A biosynthetic process	26,9224924	38,34415584	98,089701
organic phosphonate transport	15,70478723	NA	45,7751938
organic phosphonate metabolic process	23,55718085	NA	NA
anaerobic respiration	18,84574468	NA	NA
phosphate ion transmembrane transport	31,40957447	NA	NA
