# Supplementary material for: Host-induced spermidine production in motile Pseudomonas aeruginosa triggers phagocytic uptake
Source: eLife journal article supplement (doi:10.7554/elife.55744), 2020-09-22
Supplement: supp [file elife-55744-supp-v1.zip › elife_poa_e55744_Figure_3_source_data_1.xlsx]

## Sheet: Table S1
Figure 3 - Source Data: Summary of the 20 differentially expressed genes that are shared by the motility mutants in comparison to PA14 Wt.
PA14_locustag	PseudoCAPs	Regulation in comparison to PA14 Wt						GO_biological_process
		ΔfliC		ΔflgK		ΔmotABCD
		log2FC	FDR	log2FC	FDR	log2FC	FDR
PA14_02260	cheY, Two-component regulatory systems	-1.10445	0.0280688	-1.65381	4.82134e-05	-1.36888	0.000258912	phosphorelay signal transduction system
PA14_03360	Hypothetical, unclassified, unknown	-1.39463	0.000590667	-1.35361	0.000435519	-1.43349	6.05329e-05
PA14_03370	Hypothetical, unclassified, unknown	-1.87284	3.31016e-05	-1.779	4.82134e-05	-1.56427	6.79444e-05
PA14_04710	Hypothetical, unclassified, unknown	-1.57408	0.00165197	-1.6121	0.000640633	-2.0659	1.17072e-05
PA14_16980	Hypothetical, unclassified, unknown	-1.33132	0.0367891	-1.59457	0.00304923	-1.78039	0.000304284
PA14_16990	Hypothetical, unclassified, unknown	-1.6471	0.00011304	-1.72968	4.82134e-05	-2.0739	6.85325e-07
PA14_20290	algZ, Transcriptional regulators	-1.26124	0.0129908	-1.55373	0.000435519	-1.43426	0.000495014	pathogenesis | negative regulation of single-species biofilm formation on inanimate substrate | regulation of transcription, DNA-templated | type IV pilus-dependent motility | regulation of polysaccharide biosynthetic process | positive regulation of cell motility | negative regulation of flagellum assembly | negative regulation of cyclic nucleotide biosynthetic process | negative regulation of b…
PA14_32780	Hypothetical, unclassified, unknown	-1.95132	2.61256e-05	-1.7669	4.82134e-05	-2.51723	6.80916e-08	protein transport
PA14_32790	Hypothetical, unclassified, unknown	-1.66048	1.95299e-05	-1.76546	6.22487e-06	-1.93923	1.84259e-07
PA14_39790	Hypothetical, unclassified, unknown	-5.06828	6.50945e-07	-5.44603	1.42787e-07	-5.13273	4.28864e-08
PA14_49740	Hypothetical, unclassified, unknown	-1.73002	0.00110987	-1.88696	0.0001881	-2.28414	6.13384e-06
PA14_55960	pctC, Chemotaxis	-1.06823	0.0129908	-1.49564	4.82134e-05	-1.1983	0.000467645	response to amino acid | response to stimulus | chemotaxis | signal transduction
PA14_56170	Hypothetical, unclassified, unknown	-1.27863	0.00238327	-1.36617	0.000528827	-1.37324	0.000195948
PA14_56180	Hypothetical, unclassified, unknown	-1.8423	6.40295e-05	-1.68374	0.00011409	-1.59806	7.40735e-05
PA14_59400	Hypothetical, unclassified, unknown	-1.8855	0.00172323	-1.92494	0.000723396	-1.91032	0.000339674
PA14_60130	Hypothetical, unclassified, unknown	-1.09446	0.0179654	-1.26432	0.00113485	-1.02839	0.0134215
PA14_60140	DNA replication, recombination, modification and repair	-2.151	0.00113694	-2.68523	4.83031e-05	-2.86869	9.01572e-06	DNA integration | DNA recombination
PA14_63780	Hypothetical, unclassified, unknown	1.89182	1.95299e-05	1.18551	0.0117165	1.65124	1.90982e-05
PA14_64050	Two-component regulatory systems | Transcriptional regulators	-3.3368	4.01179e-10	-3.30843	5.93069e-10	-3.53711	4.94873e-11	negative regulation of bacterial-type flagellum-dependent cell motility | positive regulation of single-species biofilm formation on inanimate substrate | response to L-glutamate | phosphorelay signal transduction system | positive regulation of cell adhesion involved in single-species biofilm formation
PA14_65090	Hypothetical, unclassified, unknown	-1.54556	0.000554132	-1.75512	4.82134e-05	-1.7305	1.66501e-05
