# Supplementary material for: Host-induced spermidine production in motile Pseudomonas aeruginosa triggers phagocytic uptake
Source: eLife journal article supplement (doi:10.7554/elife.55744), 2020-09-22
Supplement: supp [file elife-55744-supp-v1.zip › elife_poa_e55744_Figure_3_source_data_2.csv]

Figure 3B - Source Data: Significantly enriched host pathways
Term	Fold.Enrichment	FDR
mmu04668:TNF signaling pathway	7,123	2,50E-17
mmu04064:NF-kappa B signaling pathway	5,503	2,99E-09
mmu04380:Osteoclast differentiation	4,621	1,50E-08
mmu04010:MAPK signaling pathway	3,093	3,94E-07
mmu04621:NOD-like receptor signaling pathway	6,385	5,85E-07
mmu04060:Cytokine-cytokine receptor interaction	3,108	6,12E-07
mmu04620:Toll-like receptor signaling pathway	4,564	1,48E-06
mmu05140:Leishmaniasis	5,686	2,80E-06
mmu05142:Chagas disease (American trypanosomiasis)	4,240	1,05E-05
mmu05323:Rheumatoid arthritis	4,734	1,21E-05
mmu05133:Pertussis	4,918	1,84E-05
mmu05152:Tuberculosis	3,171	3,53E-05
mmu05202:Transcriptional misregulation in cancer	3,235	4,47E-05
mmu05164:Influenza A	3,121	7,93E-05
mmu05161:Hepatitis B	3,324	9,48E-05
mmu05169:Epstein-Barr virus infection	3,390	0,000130295
mmu05203:Viral carcinogenesis	2,521	0,000904555
mmu05132:Salmonella infection	4,044	0,000912208
mmu05145:Toxoplasmosis	3,466	0,001168844
mmu05168:Herpes simplex infection	2,566	0,001534316
mmu05321:Inflammatory bowel disease (IBD)	4,523	0,001594959
mmu04630:Jak-STAT signaling pathway	2,844	0,003629408
mmu05166:HTLV-I infection	2,198	0,005080297
mmu04622:RIG-I-like receptor signaling pathway	3,925	0,005310172
mmu05134:Legionellosis	4,256	0,00600689
mmu05144:Malaria	4,549	0,008520301
mmu05146:Amoebiasis	2,903	0,01245553
mmu04623:Cytosolic DNA-sensing pathway	3,791	0,014236485
mmu05020:Prion diseases	5,146	0,025189106
mmu05206:MicroRNAs in cancer	2,022	0,027191378
mmu05322:Systemic lupus erythematosus	2,476	0,035365761
mmu04062:Chemokine signaling pathway	2,228	0,035695278
mmu04068:FoxO signaling pathway	2,535	0,042020994
