# Supplementary material for: Host-induced spermidine production in motile Pseudomonas aeruginosa triggers phagocytic uptake
Source: eLife journal article supplement (doi:10.7554/elife.55744), 2020-09-22
Supplement: supp [file elife-55744-supp-v1.zip › elife_poa_e55744_Figure_4_source_data_1.csv]

Figure 4 - Source Data 1: Bacterial gene regulation
	fliC_log2FC	flgK_log2FC	motABC_log2FC	fliC_FDR	flgK_FDR	motABC_FDR	logCPM	ANOVA_FDR
PA14_04180	-1,862542889	-2,129441026	-3,016252102	0,002071186	0,000133752	3,69E-07	4,800459852	5,02E-08
fptA	1,188007423	1,307584714	1,768708086	0,01203894	0,001090572	7,49E-07	2,770247915	7,14E-08
PA14_09380	2,087038146	1,876614335	2,72896686	0,006454647	0,011311112	2,69E-05	3,448108708	3,07E-05
PA14_11810	-1,260114425	-1,588967973	-2,726089432	0,023996081	0,000380024	3,09E-08	3,897286265	9,60E-09
PA14_13130	-1,709612402	-1,683085438	-2,445103641	0,00040659	0,000237194	1,62E-07	5,900924828	1,22E-08
PA14_13190	-1,35229476	-1,808410754	-2,757299965	0,006454647	2,31E-05	6,92E-09	5,971191947	1,21E-09
PA14_16260	-1,417666827	-1,608084473	-2,43735091	0,026885837	0,002733871	3,32E-06	5,283554156	9,01E-07
arnT	-2,003401567	-2,688498923	-2,987056125	3,64E-05	3,43E-07	7,11E-09	4,251586585	1,61E-10
PA14_18340	-1,604304785	-2,380533427	-3,129263489	0,018846692	6,47E-05	7,98E-07	7,028018415	1,34E-07
fmt	-1,564263468	-1,815339407	-3,253565664	2,47E-05	7,37E-07	1,15E-12	4,306460298	2,64E-13
prmF	-1,784532799	-2,378053992	-3,08677404	0,000485844	3,13E-06	1,94E-08	5,818449991	1,68E-09
arnB	-1,523838286	-2,138512213	-3,212798294	0,02098299	0,000154593	3,52E-07	5,439845798	1,19E-07
PA14_19900	-1,941763789	-2,927475509	-3,109585206	0,029645665	0,000361169	8,03E-05	3,719094836	8,53E-06
phnD	-2,596424019	-2,649084375	-3,410152063	0,026885837	0,010059426	0,000808645	3,861754413	0,000271633
PA14_32905	1,777391	1,959687627	2,404405035	0,006310563	0,000654909	7,12E-06	7,547137098	5,18E-06
pvdL	1,579035479	1,741801099	2,350452621	2,09E-05	9,45E-07	2,51E-10	5,344019404	9,58E-11
pvdH	1,883121982	2,085232465	2,682278999	5,27E-06	3,43E-07	1,15E-10	9,637993227	6,34E-11
PA14_33520	1,513253687	1,534724781	1,973892144	0,002152033	0,000776977	3,83E-06	7,090089833	1,57E-06
PA14_33560	1,373028612	1,53210078	1,703890706	0,030625935	0,00397075	0,000350971	6,748846277	5,44E-05
PA14_33610	1,50772029	1,514566186	2,172994366	1,08E-05	3,60E-06	1,29E-10	3,487177496	3,58E-11
pvdJ	1,097404946	1,200808392	1,885428241	0,00429421	0,000339151	1,39E-09	2,906454278	1,61E-10
pvdD	1,28439347	1,459750502	2,141633089	0,000614084	2,31E-05	7,78E-10	3,936745156	1,63E-10
pvdF	1,401708252	1,385615412	1,593854938	0,0013367	0,000768694	1,98E-05	6,132475738	6,11E-07
pvdO	1,53403577	1,518203525	1,970307111	0,000946896	0,000551707	1,00E-06	3,308131874	2,05E-07
pvdN	1,801272259	1,41633706	2,126256142	0,000252988	0,007104377	1,64E-06	3,879535001	4,31E-07
pvdP	1,611168675	1,515826474	2,011360295	0,00040659	0,000609272	7,94E-07	8,073685001	1,69E-07
opmQ	1,175203461	1,268289497	1,686358461	0,01714419	0,002560141	2,96E-06	5,427738878	2,18E-07
PA14_33760	1,24039486	1,210246595	1,782885668	0,006454647	0,005361959	7,39E-07	8,337910165	7,86E-08
pvdA	1,545254712	1,564027288	2,210542103	4,03E-05	1,57E-05	1,39E-09	6,943801787	4,23E-10
pvdQ	1,666570624	1,695791441	2,289469313	6,66E-05	2,50E-05	2,21E-08	4,587220553	8,38E-09
PA14_33830	2,351358417	2,274478354	2,974561443	7,74E-05	6,46E-05	1,41E-07	4,974335617	1,11E-07
PA14_39790	-3,380520685	-3,886796522	-4,462106215	0,000297994	2,77E-05	2,79E-06	7,452520968	1,19E-07
PA14_44311	-1,676477167	-2,123470914	-3,384024461	0,007521645	0,000380024	9,45E-07	8,865916923	7,56E-07
PA14_46880	-1,602759794	-1,983672593	-2,367449696	0,021169508	0,000765301	3,94E-05	6,237978032	5,77E-06
PA14_46890	-1,945141255	-1,654738048	-2,776101118	0,000706104	0,002216913	8,64E-07	7,370884942	1,69E-07
PA14_46900	-2,162098968	-2,481298172	-3,833357753	0,021225393	0,002800098	2,29E-05	4,665206796	1,25E-05
phoQ	-1,594908131	-1,817922914	-2,180258309	0,000198417	8,08E-06	7,74E-08	4,733038125	1,67E-09
phoP	-1,630032116	-1,946457157	-3,069583712	5,25E-05	8,18E-07	2,89E-11	6,383606912	5,43E-12
oprH	-1,853819052	-2,513245611	-4,013715371	9,36E-05	8,18E-07	1,43E-10	5,247286518	8,33E-11
PA14_50880	-1,399127008	-2,016702523	-2,842570074	0,031943312	0,000137267	5,24E-07	5,062484128	1,06E-07
PA14_52880	-2,335698098	-2,525195992	-3,612420561	0,00271399	0,000461594	2,98E-06	5,521951668	5,63E-07
PA14_59410	-4,387352241	-4,092388367	-3,390704207	0,00655958	0,003156793	0,005257195	3,754841544	0,000218179
PA14_62690	-1,084185379	-1,54066449	-2,536103884	0,010354734	4,30E-06	1,56E-11	11,35284467	2,02E-12
PA14_63110	-1,774017912	-1,97304452	-3,420126274	1,67E-05	8,18E-07	5,38E-12	5,996206318	9,95E-13
PA14_63120	-1,625204894	-1,832784156	-3,565034319	2,47E-05	8,87E-07	6,69E-13	5,925145354	1,68E-13
PA14_63130	-1,537228891	-1,773661168	-3,289997273	0,000242189	8,08E-06	1,84E-11	5,124217335	7,66E-12
pmrA	-1,390243422	-1,623945113	-2,63293857	0,013772784	0,000652259	1,41E-07	7,276039993	3,38E-08
PA14_63220	-1,791195939	-2,499894007	-3,310185493	0,00271399	1,40E-05	1,08E-07	6,535790603	1,31E-08
PA14_64050	-2,101013879	-2,572461379	-2,176591856	2,47E-05	7,37E-07	1,27E-06	10,59747776	1,67E-09
PA14_64610	1,161556276	1,383250224	1,710463037	0,016299818	0,000380024	1,35E-06	8,762074238	9,02E-08
PA14_64620	1,161484908	1,289727738	1,494690589	0,004438258	0,000284793	3,43E-06	8,978565288	5,29E-08
pilO	1,336459642	1,364005134	2,048982644	0,00271399	0,00082585	4,70E-08	7,776720633	9,60E-09
pilN	1,203267282	1,301912799	1,832513607	0,006548515	0,000768694	1,41E-07	9,403923441	1,31E-08
