# Supplementary material for: Host-induced spermidine production in motile Pseudomonas aeruginosa triggers phagocytic uptake
Source: eLife journal article supplement (doi:10.7554/elife.55744), 2020-09-22
Supplement: supp [file elife-55744-supp-v1.zip › elife_poa_e55744_Figure_4_source_data_2.xlsx]

## Sheet: rho_plus09_enrichment_HostRespo
Figure 4 - Source Data 2: Positive interspecies correlation of 53 PA14 genes and their association with 74 host PIP3 genes
PA14 genes	host gene correlation	PIP3 genes
	number of genes out of 12298	number of genes out of 74	PIP3 enrichment
	rho ≥ 0.8	rho ≥ 0.8	factor	p value	FDR
PA14_18360,prmF	1304	21	2.67636	1.76074e-05	0.000933194
PA14_18340	1134	17	2.49137	0.000322708	0.00855177
PA14_49180,phoP	1128	15	2.20996	0.0025829	0.0293108
PA14_62690	1038	14	2.24147	0.00321627	0.0293108
PA14_63150,pmrA	1038	14	2.24147	0.00321627	0.0293108
PA14_63110	1610	18	1.85802	0.00608388	0.0293108
PA14_63120	1610	18	1.85802	0.00608388	0.0293108
PA14_18350,fmt	1610	18	1.85802	0.00608388	0.0293108
PA14_49170,phoQ	1610	18	1.85802	0.00608388	0.0293108
PA14_44311	1610	18	1.85802	0.00608388	0.0293108
PA14_11810	1765	19	1.78901	0.0071366	0.0293108
PA14_13190	1648	18	1.81517	0.00774247	0.0293108
PA14_18370,arnB	1648	18	1.81517	0.00774247	0.0293108
PA14_50880	1648	18	1.81517	0.00774247	0.0293108
PA14_63220	622	9	2.40467	0.0119948	0.0397328
PA14_52880	622	9	2.40467	0.0119948	0.0397328
PA14_46880	890	11	2.05402	0.0168633	0.0525739
PA14_49200,oprH	829	9	1.80423	0.059988	0.169734
PA14_13130	468	6	2.13063	0.0622017	0.169734
PA14_04180	848	9	1.7638	0.0672532	0.169734
PA14_16260	848	9	1.7638	0.0672532	0.169734
PA14_20320,phnD	171	3	2.9156	0.0838482	0.201998
PA14_33720,pvdN	40	1	4.15473	0.214788	0.494946
PA14_09380	52	1	3.19595	0.269843	0.595904
PA14_64050	308	3	1.61873	0.283031	0.600026
PA14_18330,arnT	1674	12	1.19132	0.302882	0.617414
PA14_46900	352	3	1.41639	0.355766	0.698356
PA14_33610	112	1	1.48383	0.492899	0.932987
PA14_66640,pilO	135	1	1.23103	0.559245	1
PA14_63130	334	2	0.995145	0.601183	1
PA14_33700,pvdF	159	1	1.04522	0.619347	1
PA14_39790	561	3	0.888712	0.662599	1
PA14_33740,pvdP	189	1	0.879308	0.683214	1
PA14_33560	197	1	0.8436	0.698379	1
PA14_33810,pvdA	219	1	0.758855	0.736486	1
PA14_33710,pvdO	219	1	0.758855	0.736486	1
PA14_33820,pvdQ	222	1	0.7486	0.7413	1
PA14_33760	222	1	0.7486	0.7413	1
PA14_19900	1672	8	0.795164	0.805631	1
PA14_64620	323	1	0.514518	0.861307	1
PA14_33500,pvdH	366	1	0.454069	0.893808	1
PA14_33650,pvdD	366	1	0.454069	0.893808	1
PA14_33750,opmQ	554	1	0.29998	0.967332	1
PA14_33280,pvdL	578	1	0.287525	0.971935	1
PA14_33830	110	0	0	1	1
PA14_46890	123	0	0	1	1
PA14_33520	131	0	0	1	1
PA14_33630,pvdJ	246	0	0	1	1
PA14_32905	144	0	0	1	1
PA14_66650,pilN	144	0	0	1	1
PA14_59410	32	0	0	1	1
PA14_09340,fptA	241	0	0	1	1
PA14_64610	318	0	0	1	1
