# Supplementary material for: Host-induced spermidine production in motile Pseudomonas aeruginosa triggers phagocytic uptake
Source: eLife journal article supplement (doi:10.7554/elife.55744), 2020-09-22
Supplement: supp [file elife-55744-supp-v1.zip › elife_poa_e55744_Figure_4_source_data_3.xlsx]

## Sheet: rho_plus09_enrichment_HostRespo
Figure 4 - Source Data 3: Negative interspecies correlation of 53 PA14 genes and their association with 74 host PIP3 genes
PA14 genes	host gene correlation	PIP3 genes
	number of genes out of 12298	number of genes out of 74	PIP3 enrichment
	rho ≤ -0.8	rho ≤ -0.8	factor	p value	FDR
PA14_33500,pvdH	1289	18	2.32072	0.000494071	0.0114361
PA14_33650,pvdD	1289	18	2.32072	0.000494071	0.0114361
PA14_33630,pvdJ	1204	17	2.34653	0.000647325	0.0114361
PA14_64610	1200	15	2.07736	0.00465588	0.053741
PA14_33830	451	8	2.94792	0.00556589	0.053741
PA14_33750,opmQ	1610	18	1.85802	0.00608388	0.053741
PA14_33280,pvdL	1648	18	1.81517	0.00774247	0.0586216
PA14_64620	1426	16	1.86468	0.0096418	0.063877
PA14_33560	622	9	2.40467	0.0119948	0.0706361
PA14_33520	515	7	2.25888	0.0348738	0.184831
PA14_32905	796	9	1.87902	0.0486306	0.214785
PA14_66650,pilN	796	9	1.87902	0.0486306	0.214785
PA14_33820,pvdQ	468	6	2.13063	0.0622017	0.235478
PA14_33760	468	6	2.13063	0.0622017	0.235478
PA14_33810,pvdA	539	6	1.84997	0.105139	0.348272
PA14_33710,pvdO	539	6	1.84997	0.105139	0.348272
PA14_33740,pvdP	364	4	1.82625	0.17582	0.548145
PA14_46890	41	1	4.05339	0.219528	0.646388
PA14_33700,pvdF	361	3	1.38107	0.370622	1
PA14_09340,fptA	672	5	1.23653	0.379862	1
PA14_63130	135	1	1.23103	0.559245	1
PA14_66640,pilO	334	2	0.995145	0.601183	1
PA14_46900	194	1	0.856645	0.692778	1
PA14_63220	197	1	0.8436	0.698379	1
PA14_52880	197	1	0.8436	0.698379	1
PA14_33610	203	1	0.818666	0.70928	1
PA14_13130	222	1	0.7486	0.7413	1
PA14_18340	365	1	0.455313	0.893146	1
PA14_49200,oprH	378	1	0.439654	0.901451	1
PA14_49180,phoP	379	1	0.438494	0.902062	1
PA14_19900	412	1	0.403372	0.920279	1
PA14_18330,arnT	414	1	0.401423	0.921269	1
PA14_04180	440	1	0.377703	0.933082	1
PA14_16260	440	1	0.377703	0.933082	1
PA14_11810	527	1	0.31535	0.961261	1
PA14_63110	554	1	0.29998	0.967332	1
PA14_63120	554	1	0.29998	0.967332	1
PA14_18350,fmt	554	1	0.29998	0.967332	1
PA14_49170,phoQ	554	1	0.29998	0.967332	1
PA14_44311	554	1	0.29998	0.967332	1
PA14_13190	578	1	0.287525	0.971935	1
PA14_18370,arnB	578	1	0.287525	0.971935	1
PA14_50880	578	1	0.287525	0.971935	1
PA14_64050	105	0	0	1	1
PA14_33720,pvdN	155	0	0	1	1
PA14_39790	132	0	0	1	1
PA14_18360,prmF	333	0	0	1	1
PA14_09380	98	0	0	1	1
PA14_59410	28	0	0	1	1
PA14_62690	267	0	0	1	1
PA14_63150,pmrA	267	0	0	1	1
PA14_46880	190	0	0	1	1
PA14_20320,phnD	29	0	0	1	1
