# Supplementary material for: Host-induced spermidine production in motile Pseudomonas aeruginosa triggers phagocytic uptake
Source: eLife journal article supplement (doi:10.7554/elife.55744), 2020-09-22
Supplement: supp [file elife-55744-supp-v1.zip › elife_poa_e55744_Figure_4_source_data_4.xlsx]

## Sheet: Figure 4 - Source Data 4
Figure 4 - Source Data 4: Differentially expressed genes between the fliC mutant and PA14 wild type after a medium switch from LB to DMEM medium containing FCS. Depicted are significant genes (FDR ≤ 0.05) as well as arnT and the spermidine synthesis operon including their FDR rank.
PA14 genes	log2FC	FDR	FDR rank	logCPM
PA14_50290,fliC	-7.20011	8.9889e-09	1	4.34966
PA14_64050	-3.8426	1.18412e-05	2	8.63074
PA14_33520	3.04161	0.00358366	3	7.82523
PA14_16990	-2.14704	0.00560487	4	5.52915
PA14_33610	1.69546	0.00637874	5.5	5.95172
PA14_49740	-2.52053	0.00637874	5.5	9.34382
PA14_33280,pvdL	1.88184	0.00823875	7	5.0363
PA14_50250,fliS	1.69546	0.0122154	8	3.95888
PA14_31330	-2.82564	0.0127003	9.5	7.92105
PA14_60130	-2.50505	0.0127003	9.5	7.63874
PA14_33820,pvdQ	1.92238	0.0135002	11	7.78285
PA14_32790	-1.44614	0.0186397	12	5.10677
PA14_21260	1.48375	0.0251172	13	7.76265
PA14_04710	-2.83363	0.0258373	14	7.33864
PA14_71900	-1.37415	0.029246	15	4.40517
PA14_60140	-2.92456	0.0293634	16	7.55366
PA14_50270,fliD	1.20492	0.0483278	17	9.30302
PA14_63110	-0.73266	0.973567	2065	7.86431
PA14_63120	-1.04153	0.973567	2065	2.83587
PA14_63130	-0.892009	0.973567	2065	4.31182
PA14_18330,arnT	0.736642	0.985391	3669	6.32653
