# Supplementary material for: Host-induced spermidine production in motile Pseudomonas aeruginosa triggers phagocytic uptake
Source: eLife journal article supplement (doi:10.7554/elife.55744), 2020-09-22
Supplement: supp [file elife-55744-supp-v1.zip › elife_poa_e55744_Figure_5_source_data_1.xlsx]

## Sheet: calcium_PIP3_KMC_sep2
Figure 5 - Source Data: Enrichment of calcium and PIP3-related functions of a downregulated (log2FC < 0) subset of Top 1000 genes from ΔfliC, ΔflgK and ΔmotABCD mutants
Mutant	Category	Term	Genes	Number of genes in background	Fold enrichment	P value	FDR
ΔflgK	GOTERM_MF_DIRECT	GO:0035091~phosphatidylinositol binding	SH3PXD2B, TULP4, SGK1, NISCH, AIDA, MYO1E, PHF12, ITPR3, WDR35, SNX30, ZCCHC14, ITPR1, ITPR2	89	3.34422	0.000472459	0.00740207
ΔfliC	GOTERM_MF_DIRECT	GO:0035091~phosphatidylinositol binding	SGK1, AIDA, ITPR3, MCF2L, ITPR2	89	1.54348	0.406175	0.999692
ΔmotABCD	GOTERM_MF_DIRECT	GO:0035091~phosphatidylinositol binding	SH3PXD2B, SGK1, SNX29, NISCH, AIDA, MYO1E, PHF12, ITPR3, MCF2L, ITPR1, HIP1, ITPR2	89	3.20037	0.00124777	0.0194353
ΔflgK	KEGG_PATHWAY	mmu04070:Phosphatidylinositol signaling system	PLCB3, PLCG2, PI4KA, INPP5D, OCRL, ITPR3, PIK3R1, ITPR1, ITPR2	97	2.25822	0.0447852	0.447097
ΔfliC	KEGG_PATHWAY	mmu04070:Phosphatidylinositol signaling system	PLCB3, INPP5K, DGKG, PI4KA, INPP5D, OCRL, ITPR3, PIK3R3, IP6K2, ITPR2	97	2.93662	0.00665691	0.0834564
ΔmotABCD	KEGG_PATHWAY	mmu04070:Phosphatidylinositol signaling system	INPPL1, PLCG2, PI4KA, PRKCG, INPP5D, ITPKC, OCRL, ITPR3, PIK3R1, ITPR1, ITPR2	97	2.65907	0.00793607	0.0985646
ΔflgK	GOTERM_MF_DIRECT	GO:0005220~inositol 1,4,5-trisphosphate-sensitive calcium-release channel activity	ITPR3, ITPR1, ITPR2	3	22.895	0.00553565	0.0835718
ΔfliC	GOTERM_MF_DIRECT	GO:0005220~inositol 1,4,5-trisphosphate-sensitive calcium-release channel activity	ITPR3, ITPR2	3	18.316	0.105114	0.821429
ΔmotABCD	GOTERM_MF_DIRECT	GO:0005220~inositol 1,4,5-trisphosphate-sensitive calcium-release channel activity	ITPR3, ITPR1, ITPR2	3	23.7361	0.00515504	0.0780319
ΔflgK	UP_KEYWORDS	Calcium transport	ATP2B1, ATP2B4, ATP2A2, ATP2A3, TRPV4, ITPR3, CACNA1A, ITPR1, ITPR2	93	2.56107	0.0242971	0.283016
ΔfliC	UP_KEYWORDS	Calcium transport	ATP2A3, ITPR3, ITPR2	93	0.990004	0.810224	1
ΔmotABCD	UP_KEYWORDS	Calcium transport	ATP2B1, SLC8A1, ATP2B4, ATP2A2, ATP2A3, ITPR3, CACNA1A, TPCN1, ITPR1, CACNA1B, TPCN2, ITPR2	93	3.56016	0.000534318	0.00725494
ΔflgK	GOTERM_MF_DIRECT	GO:0005262~calcium channel activity	TRPM4, DENND5A, PKD2, TRPV4, ITPR3, CACNA1A, ITPR1, ITPR2	86	2.12977	0.0813279	0.736475
ΔfliC	GOTERM_MF_DIRECT	GO:0005262~calcium channel activity	TRPM4, DENND5A, PKD2, ITPR3, ITPR2	86	1.59733	0.381365	0.999418
ΔmotABCD	GOTERM_MF_DIRECT	GO:0005262~calcium channel activity	TRPM4, DENND5A, PKD2, PKD1, ITPR3, CACNA1A, TPCN1, ITPR1, CACNA1B, TPCN2, ITPR2	86	3.03601	0.00323056	0.0495934
ΔflgK	GOTERM_BP_DIRECT	GO:0006816~calcium ion transport	ATP2B1, TRPM4, P2RX7, ATP2B4, ATP2A2, ATP2A3, PKD2, TRPV4, ITPR3, CACNA1A, ITPR1, NFATC1, ITPR2	141	2.18211	0.0163129	0.258318
ΔfliC	GOTERM_BP_DIRECT	GO:0006816~calcium ion transport	TRPM4, ATP2A3, PKD2, CCL5, ITPR3, ITPR2	141	1.21941	0.54756	0.999999
ΔmotABCD	GOTERM_BP_DIRECT	GO:0006816~calcium ion transport	TRPM4, SLC8A1, ITPR3, TPCN1, ITPR1, TPCN2, ITPR2, ATP2B1, ATP2B4, CYP27B1, ATP2A2, ATP2A3, PKD2, PKD1, CHRNB2, CACNA1A, CACNA1B, NFATC1	141	3.07779	7.53902e-05	0.00137604
ΔflgK	GOTERM_BP_DIRECT	GO:0007204~positive regulation of cytosolic calcium ion concentration	CXCL1, TRPM4, ADM, PLCG2, PKD2, LRP6, TRPV4, ITPR3, ABL1, CACNA1A, ITPR1	148	1.75907	0.0963541	0.841318
ΔfliC	GOTERM_BP_DIRECT	GO:0007204~positive regulation of cytosolic calcium ion concentration	TRPM4, ADM, PTGER4, ITGAV, TACR1, PKD2, IL1B, NMB, ITPR3, FKBP1B	148	1.93622	0.0743641	0.750652
ΔmotABCD	GOTERM_BP_DIRECT	GO:0007204~positive regulation of cytosolic calcium ion concentration	CXCL1, TRPM4, SLC8A1, C5AR1, PTGER4, EDN1, ITPR3, ITPR1, ADM, PTK2B, PLCG2, LRP6, PKD2, PKD1, ABL1, CACNA1A	148	2.60641	0.00124894	0.0225666
ΔflgK	GOTERM_BP_DIRECT	GO:0070588~calcium ion transmembrane transport	ATP2B1, ATP2B4, ATP2A2, ATP2A3, PKD2, TRPV4, ITPR3, CACNA1A, ITPR1, ITPR2	88	2.68949	0.0118369	0.194545
ΔfliC	GOTERM_BP_DIRECT	GO:0070588~calcium ion transmembrane transport	ATP2A3, ITGAV, PKD2, ITPR3, ITPR2	88	1.62819	0.367817	0.999737
ΔmotABCD	GOTERM_BP_DIRECT	GO:0070588~calcium ion transmembrane transport	SLC8A1, ITPR3, TPCN1, ITPR1, ITPR2, TPCN2, ATP2B1, ATP2B4, ATP2A2, ATP2A3, PKD2, PKD1, ANO6, CACNA1A, CACNA1B	88	4.10955	1.45054e-05	0.000264896
ΔflgK	KEGG_PATHWAY	mmu04020:Calcium signaling pathway	PHKA2, ITPR3, ITPR1, ITPR2, ATP2B1, ADRB2, PLCB3, P2RX7, ATP2B4, ADCY9, ATP2A2, ATP2A3, PLCG2, CACNA1A	180	1.893	0.0331986	0.353797
ΔfliC	KEGG_PATHWAY	mmu04020:Calcium signaling pathway	PLCB3, ATP2A3, TACR1, GNA11, PPP3R1, ITPR3, ITPR2	180	1.10776	0.606395	0.999995
ΔmotABCD	KEGG_PATHWAY	mmu04020:Calcium signaling pathway	PHKA2, SLC8A1, ADCY7, PRKCG, ITPKC, ITPR3, ITPR1, ITPR2, ATP2B1, ADRB2, ATP2B4, ADCY9, ATP2A2, PTK2B, ATP2A3, PLCG2, CACNA1A, CACNA1B	180	2.34482	0.00163607	0.0210988
