# Supplementary material for: Host-induced spermidine production in motile Pseudomonas aeruginosa triggers phagocytic uptake
Source: eLife journal article supplement (doi:10.7554/elife.55744), 2020-09-22
Supplement: supp [file elife-55744-supp-v1.zip › elife_poa_e55744_Figure_6_source_data_1.csv]

Figure 6 - Source Data 1: Spermidine induced gene induction
gene	logFC_Spermidine	logCPM_Spermidine	F_Spermidine	PValue_Spermidine	FDR_Spermidine	logFC_PA14	logCPM_PA14	F_PA14	PValue_PA14	FDR_PA14
Clk4	0,346255295	5,122280983	57,39416949	4,52E-05	0,496460024	0,193513875	4,875109564	0,485320501	0,501197118	0,833949355
Adgre5	-0,231066174	3,829346278	14,08612436	0,004967664	0,990061931	-0,030943621	-0,160077289	0,007519829	0,932528639	0,980986832
Bmyc	-0,130538747	5,41230353	9,427760906	0,014170196	0,990061931	-0,242132667	1,850244048	1,14502076	0,308584082	0,723907881
Car2	0,31482071	2,790873103	8,729455525	0,017013728	0,990061931	0,247184536	5,838960624	3,972839902	0,072877136	0,388384939
Ccdc93	-0,11776468	5,077324729	8,384190956	0,018682102	0,990061931	0,103014442	6,628880772	0,572598548	0,465874598	0,816564078
Ccnf	-0,104805444	6,959337506	11,52619427	0,008550554	0,990061931	-0,272611139	5,686041639	2,192273455	0,168086275	0,578007859
Clk1	0,226229256	5,093419509	14,21869463	0,004838778	0,990061931	0,409681879	6,57706203	8,842552953	0,013278663	0,14185353
Clk3	0,169105146	6,460203761	18,61567947	0,002196117	0,990061931	0,237433565	6,134555598	2,264843461	0,161823865	0,570639352
Ddhd1	-0,472351319	1,097478258	9,312207521	0,014597408	0,990061931	0,044932036	3,987037283	0,063408402	0,806049972	0,944929196
Dsn1	0,115393135	5,745161385	8,972368962	0,01595019	0,990061931	-0,027207563	5,224274091	0,027659457	0,871072264	0,962964461
Eif5	0,180043124	8,641746529	26,92839902	0,000674404	0,990061931	-0,01383224	8,321299777	0,0140631	0,907840862	0,972368196
Fam120a	-0,124705812	6,803579985	8,749951252	0,016920646	0,990061931	-0,106625524	8,076943143	0,270075494	0,614064159	0,878395058
Fgfr1op	0,142232643	5,842129971	15,70778618	0,003640746	0,990061931	-0,250607608	5,43404002	3,706586793	0,081706205	0,415778855
Hcar2	0,360509617	3,094458851	8,876305368	0,016360598	0,990061931	1,60804278	4,103188785	94,83624746	1,39E-06	0,000124056
Hist1h1e	-0,524187892	2,751073646	24,45681175	0,000926899	0,990061931	-0,375007355	8,022295432	2,805784661	0,123421152	0,511277993
Irak2	0,152698228	6,427666179	14,2116409	0,004845531	0,990061931	0,995478334	6,829649118	42,33978386	5,46E-05	0,002421638
Jun	-0,19999233	5,958613626	11,21767237	0,009175176	0,990061931	1,799422743	8,171212943	40,9118353	6,67E-05	0,002845527
Map3k14	-0,237067978	3,964410754	10,68832829	0,01038477	0,990061931	-0,362189561	3,972118537	6,055402266	0,032590343	0,24979196
Map4k2	-0,221753607	3,52894768	8,256623406	0,019349786	0,990061931	-0,197311073	4,307617488	2,573162631	0,138328897	0,53621118
Mbd4	-0,192197893	4,925104493	11,01236275	0,009622405	0,990061931	-0,686065459	3,192183077	22,84921877	0,000651271	0,016965715
Mdm2	0,096356801	7,024071104	12,31467925	0,007178326	0,990061931	0,942287186	8,084619482	23,32151671	0,000603393	0,016026631
Nop58	0,097432613	8,116984344	11,31938142	0,008963185	0,990061931	-0,039221273	7,566072284	0,035263798	0,854624893	0,960616171
Nr4a1	0,307606844	3,673584587	10,40456349	0,011114901	0,990061931	4,647063041	5,436048496	632,5985404	1,01E-10	6,62E-08
Pim3	0,174150189	6,19082176	10,20025056	0,011680386	0,990061931	0,590489503	6,41064405	10,17597969	0,009103199	0,111206919
Pip5k1a	0,112650429	5,745627231	9,512171372	0,013867923	0,990061931	0,416526313	6,787510363	8,789870386	0,013486393	0,143352499
Plek	0,120968689	8,67684893	13,41871698	0,005685159	0,990061931	1,093001589	10,10126764	31,08053968	0,000197594	0,006544728
Plekhf1	0,300023152	3,580369428	8,105517452	0,020179628	0,990061931	1,576019684	2,990669732	46,61697793	3,60E-05	0,001699003
Ptger4	0,230190707	5,075116754	13,62263633	0,00545305	0,990061931	1,443975743	3,543666486	58,20240329	1,35E-05	0,000780232
Ptpn22	0,157899127	7,273530558	13,55981278	0,005523286	0,990061931	0,768405659	5,838510355	12,54035918	0,00496319	0,072773836
Ranbp6	-0,247443029	3,535632813	16,07922568	0,003401222	0,990061931	-0,751523341	3,867135098	27,2063535	0,000334874	0,00995141
Rassf1	0,104999952	5,755629304	8,781098509	0,0167804	0,990061931	-0,443483895	4,193690802	1,58890597	0,235890258	0,660023362
Slc1a4	-0,338713669	1,685820761	8,307284799	0,019081121	0,990061931	0,501869472	1,484436484	3,675672301	0,082815189	0,418677681
Smg5	0,125239383	6,608761147	10,23968953	0,011568492	0,990061931	-0,223541518	7,534108769	3,455009741	0,091298642	0,442612805
Tbc1d2b	0,224670741	4,579964012	11,250808	0,009105435	0,990061931	-0,200499399	5,217320991	1,157927361	0,306008267	0,721824078
Tdp2	0,119606604	6,053757587	9,641617791	0,01341979	0,990061931	-0,431597815	4,839300352	9,082561727	0,012379617	0,135287004
Tmem87b	0,139666616	4,81901889	8,884134612	0,016326661	0,990061931	-0,073748097	4,947149719	0,122889116	0,732855875	0,919732919
Txnip	-0,172721345	6,184073995	11,56470947	0,008476333	0,990061931	-1,354764364	6,725818516	46,72191721	3,57E-05	0,001689589
Upf1	-0,266523203	3,933991713	9,881102699	0,012637187	0,990061931	-0,043773154	6,970149097	0,103304507	0,754208936	0,927511299
Uvrag	0,108304744	6,659117826	13,84473235	0,00521346	0,990061931	-0,112945051	6,81772957	0,377688544	0,551932042	0,853808777
Vps54	-0,248369575	3,065070711	8,287192878	0,019187112	0,990061931	-0,195231323	5,32555325	2,056899576	0,180632861	0,593698497
Wdr43	0,086542951	8,393653653	8,807706679	0,016661737	0,990061931	-0,05075649	7,968072979	0,121780179	0,734011421	0,919732919
Yy1	-0,194820825	3,371835437	8,392839202	0,018637885	0,990061931	-0,027419645	6,387131181	0,042433477	0,840736641	0,956019013
Zc3hav1	-0,19147696	4,627427645	9,927485422	0,012492236	0,990061931	0,254832997	7,784059372	3,069843207	0,108873619	0,482006898
Zcchc7	0,154879462	4,077076129	8,876264819	0,016360774	0,990061931	0,224945709	3,145720561	0,233595024	0,639201308	0,886438799
