# Supplementary material for: Host-induced spermidine production in motile Pseudomonas aeruginosa triggers phagocytic uptake
Source: eLife journal article supplement (doi:10.7554/elife.55744), 2020-09-22
Supplement: supp [file elife-55744-supp-v1.zip › elife_poa_e55744_Figure_6_source_data_2.xlsx]

## Sheet: Table S2
Figure 6 - Source Data 2: Shared enriched functions of spermidine-treated and PA14-infected macrophages
Top 100 Spermidine genes
Category	Term	Gene count	Genes	Fold Enrichment	FDR
UP_KEYWORDS	Phosphoprotein	43	DCC, PRKCZ, ZC3HAV1, CCDC93, VPS54, EIF5, UVRAG, MAP4K2, PTPN22, CLK1, SLC1A4, DDHD1, CLK3, RANBP6, CLK4, TMEM87B, HCAR2, ZCCHC7, CAR2, TXNIP, HIST1H1E, TBC1D2B, UPF1, PTGER4, PLEK, DSN1, SMG5, ADGRE5, YY1, CCNF, NR4A1, MBD4, PIM3, BMYC, FAM120A, TDP2, JUN, FGFR1OP, RASSF1, MDM2, NOP58, MAP3K14, WDR43	1.39168	0.095395
UP_KEYWORDS	Nucleus	32	ZC3HAV1, AZIN1, CLK1, OAS2, PIP5K1A, HOXD11, CLK3, RANBP6, CLK4, ZCCHC7, KLF6, HIST1H1E, UPF1, SMG5, DSN1, YY1, CCNF, NR4A1, MBD4, BMYC, ZFP59, DCLRE1B, CSRNP3, TDP2, JUN, RASSF1, PRKRIP1, ZFP263, NOP58, MDM2, WDR43, SNRPE	1.7399	0.0134617
GOTERM_CC_DIRECT	GO:0005634~nucleus	38	PRKCZ, ZC3HAV1, PTPN22, AZIN1, CLK1, OAS2, PIP5K1A, HOXD11, CLK3, RANBP6, CLK4, ZCCHC7, IRAK2, TXNIP, KLF6, HIST1H1E, UPF1, DSN1, SMG5, YY1, CCNF, NR4A1, MBD4, BMYC, ZFP59, DCLRE1B, CSRNP3, FAM120A, TDP2, JUN, FGFR1OP, RASSF1, PRKRIP1, ZFP263, NOP58, MDM2, WDR43, SNRPE	1.47777	0.0581502
UP_KEYWORDS	Ubl conjugation	16	TXNIP, DCC, HIST1H1E, YY1, MAP4K2, PIM3, AZIN1, PIP5K1A, DCLRE1B, TDP2, JUN, FBXL5, NOP58, MDM2, MAP3K14, WDR43	2.62083	0.0106999
UP_KEYWORDS	Cytoplasm	30	SAT1, PRKCZ, ZC3HAV1, CCDC92, GNA11, MAP4K2, PTPN22, OAS2, PIP5K1A, DDHD1, RILPL2, CLK3, RANBP6, CAR2, TXNIP, UPF1, SMG5, YY1, CCNF, NR4A1, PIM3, ARRDC3, DCLRE1B, FAM120A, FGFR1OP, RASSF1, FBXL5, MDM2, MAP3K14, SNRPE	1.6793	0.0370488
GOTERM_CC_DIRECT	GO:0005737~cytoplasm	46	SAT1, PRKCZ, ZC3HAV1, CCDC92, GNA11, EIF5, MAP4K2, PTPN22, AZIN1, CLK1, OAS2, PIP5K1A, RGS11, DDHD1, RILPL2, CLK3, RANBP6, NAIP5, ZCCHC7, CAR2, IRAK2, TXNIP, KLF6, HYAL1, UPF1, PLEK, DSN1, SMG5, YY1, CCNF, NR4A1, MBD4, PIM3, ARRDC3, DCLRE1B, FAM120A, ADM, TDP2, RASSF1, FGFR1OP, FBXL5, ZFP263, MDM2, NOP58, MAP3K14, SNRPE	1.62378	0.00115031
UP_KEYWORDS	Zinc-finger	16	KLF6, PRKCZ, ZFP433, ZFP51, UPF1, ZC3HAV1, YY1, NR4A1, ZFP59, RNF225, GM14295, ZFP808, RASSF1, ZFP263, MDM2, ZCCHC7	2.52035	0.0158155
UP_KEYWORDS	Zinc	19	KLF6, PRKCZ, ZFP433, ZFP51, UPF1, ZC3HAV1, YY1, NR4A1, ZFP59, RNF225, GM14295, ZFP808, RASSF1, NAIP5, TIMM9, ZFP263, MDM2, CAR2, ZCCHC7	2.2315	0.0179043
UP_KEYWORDS	Metal-binding	24	KLF6, PRKCZ, ZFP433, UPF1, ZFP51, ZC3HAV1, YY1, GNA11, NR4A1, ZFP59, OAS2, CD209C, RNF225, GM14295, ZFP808, TDP2, RASSF1, NAIP5, TIMM9, FBXL5, ZFP263, MDM2, CAR2, ZCCHC7	1.74272	0.0783175
UP_KEYWORDS	Serine/threonine-protein kinase	7	PRKCZ, CLK3, CLK4, MAP4K2, PIM3, CLK1, MAP3K14	4.26087	0.0663392
