# Supplementary figures and images for: Host-induced spermidine production in motile Pseudomonas aeruginosa triggers phagocytic uptake
Source: eLife journal article supplement (doi:10.7554/elife.55744), 2020-09-22

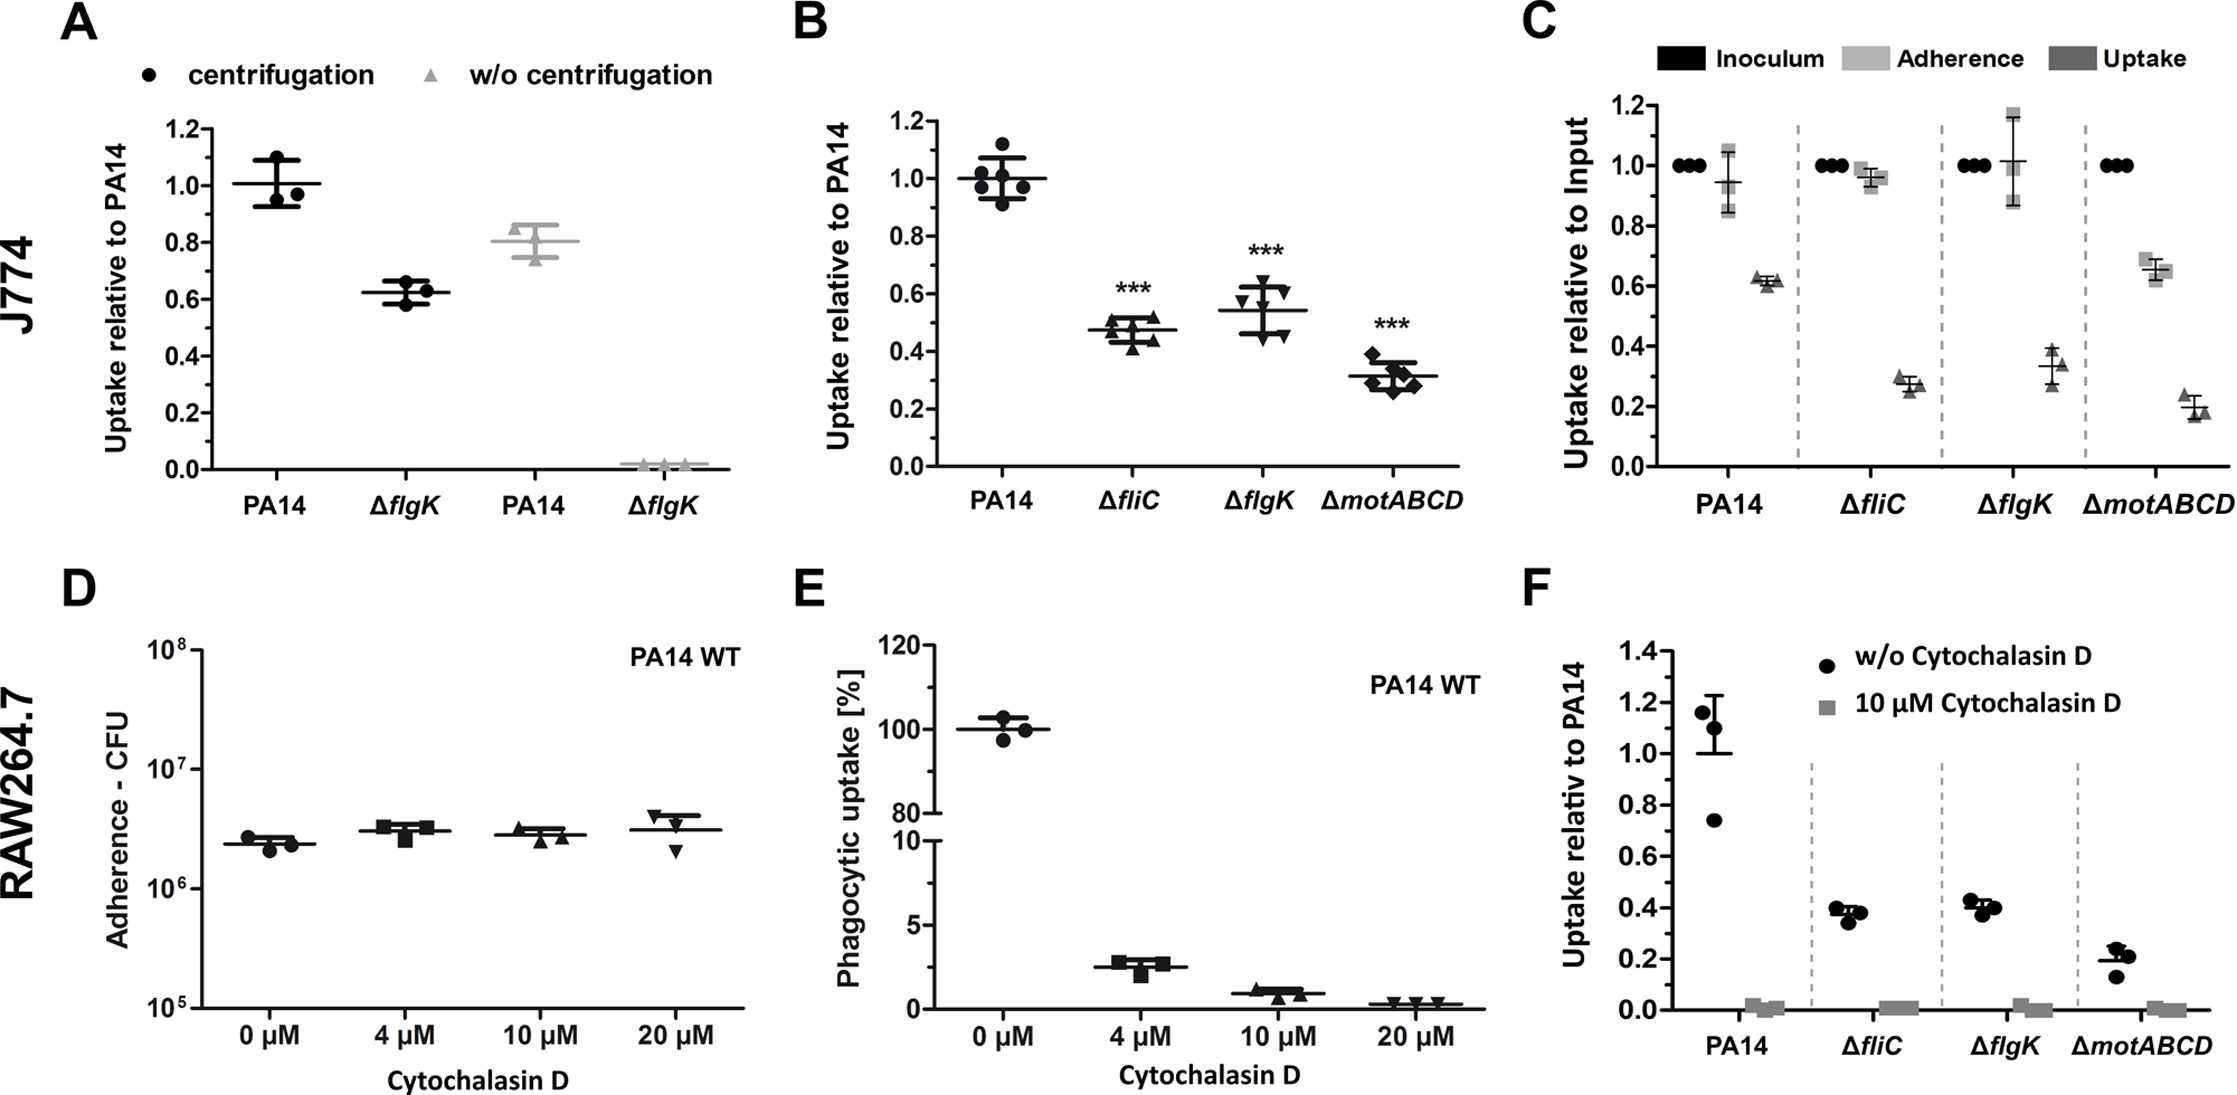

Supplement: supp [file elife-55744-supp-v1.zip › elife_poa_e55744_Figure_2_figure_supplement_1.tif]

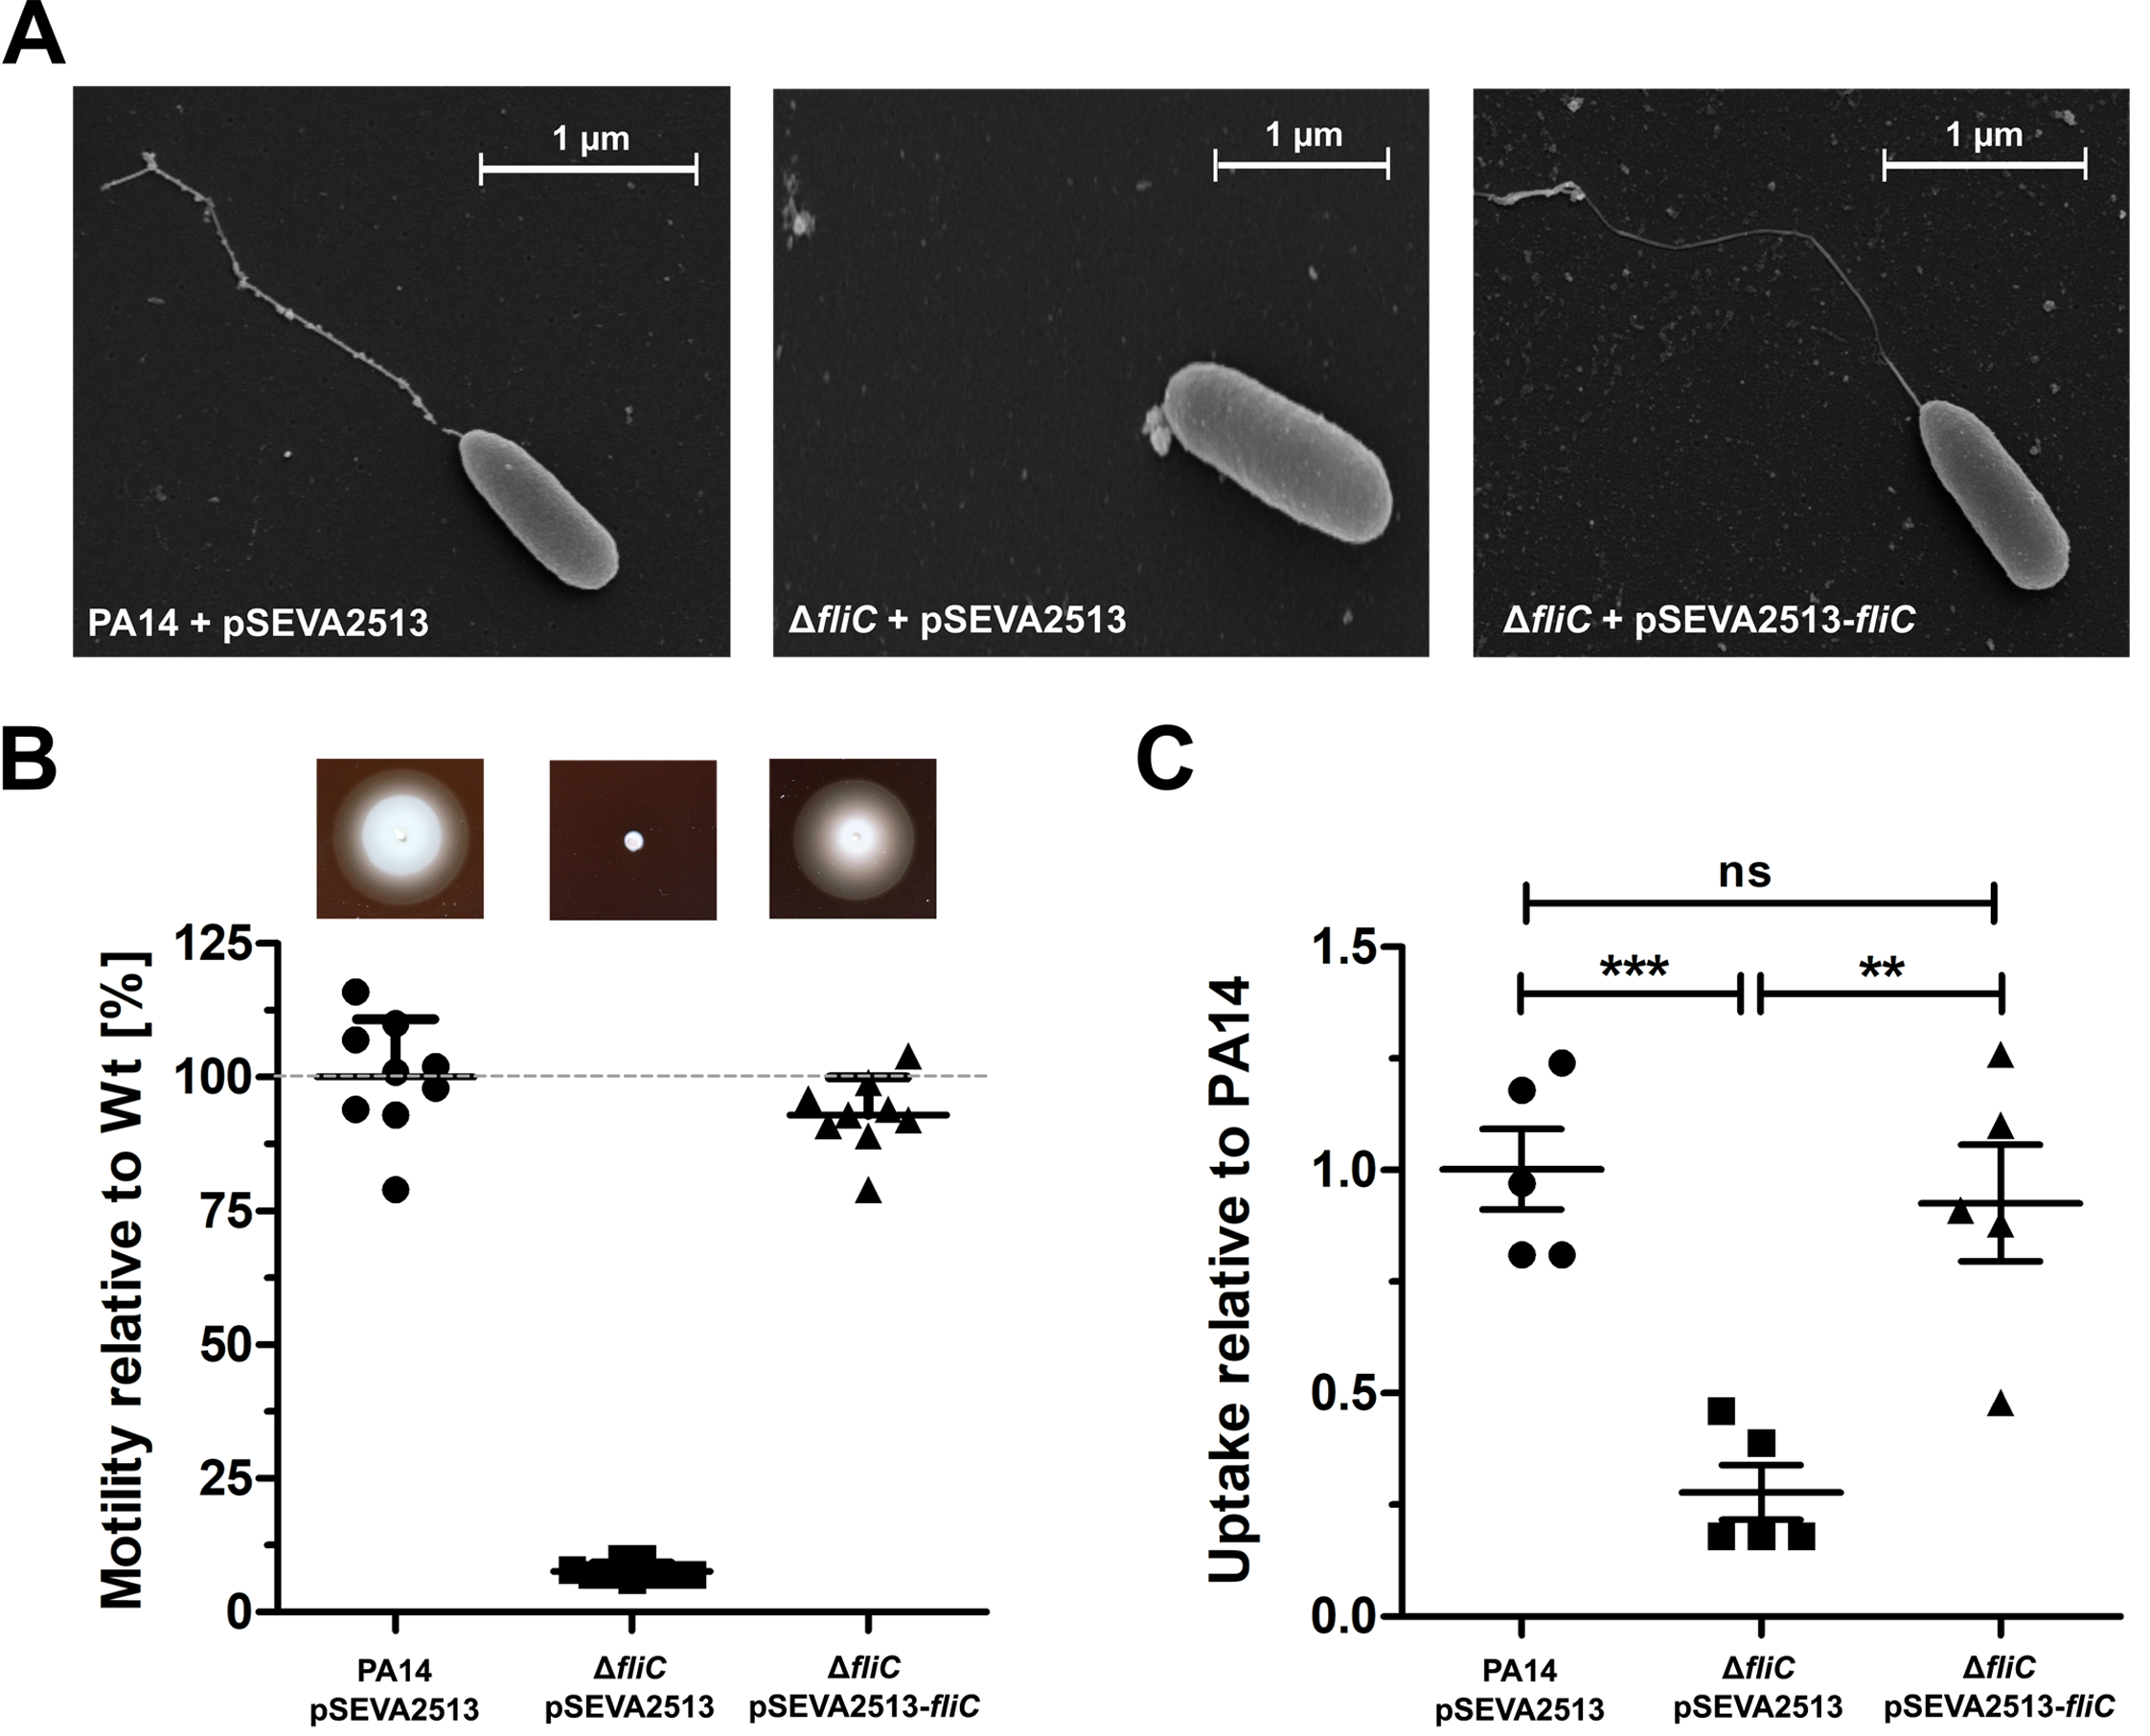

Supplement: supp [file elife-55744-supp-v1.zip › elife_poa_e55744_Figure_2_figure_supplement_2.tif]

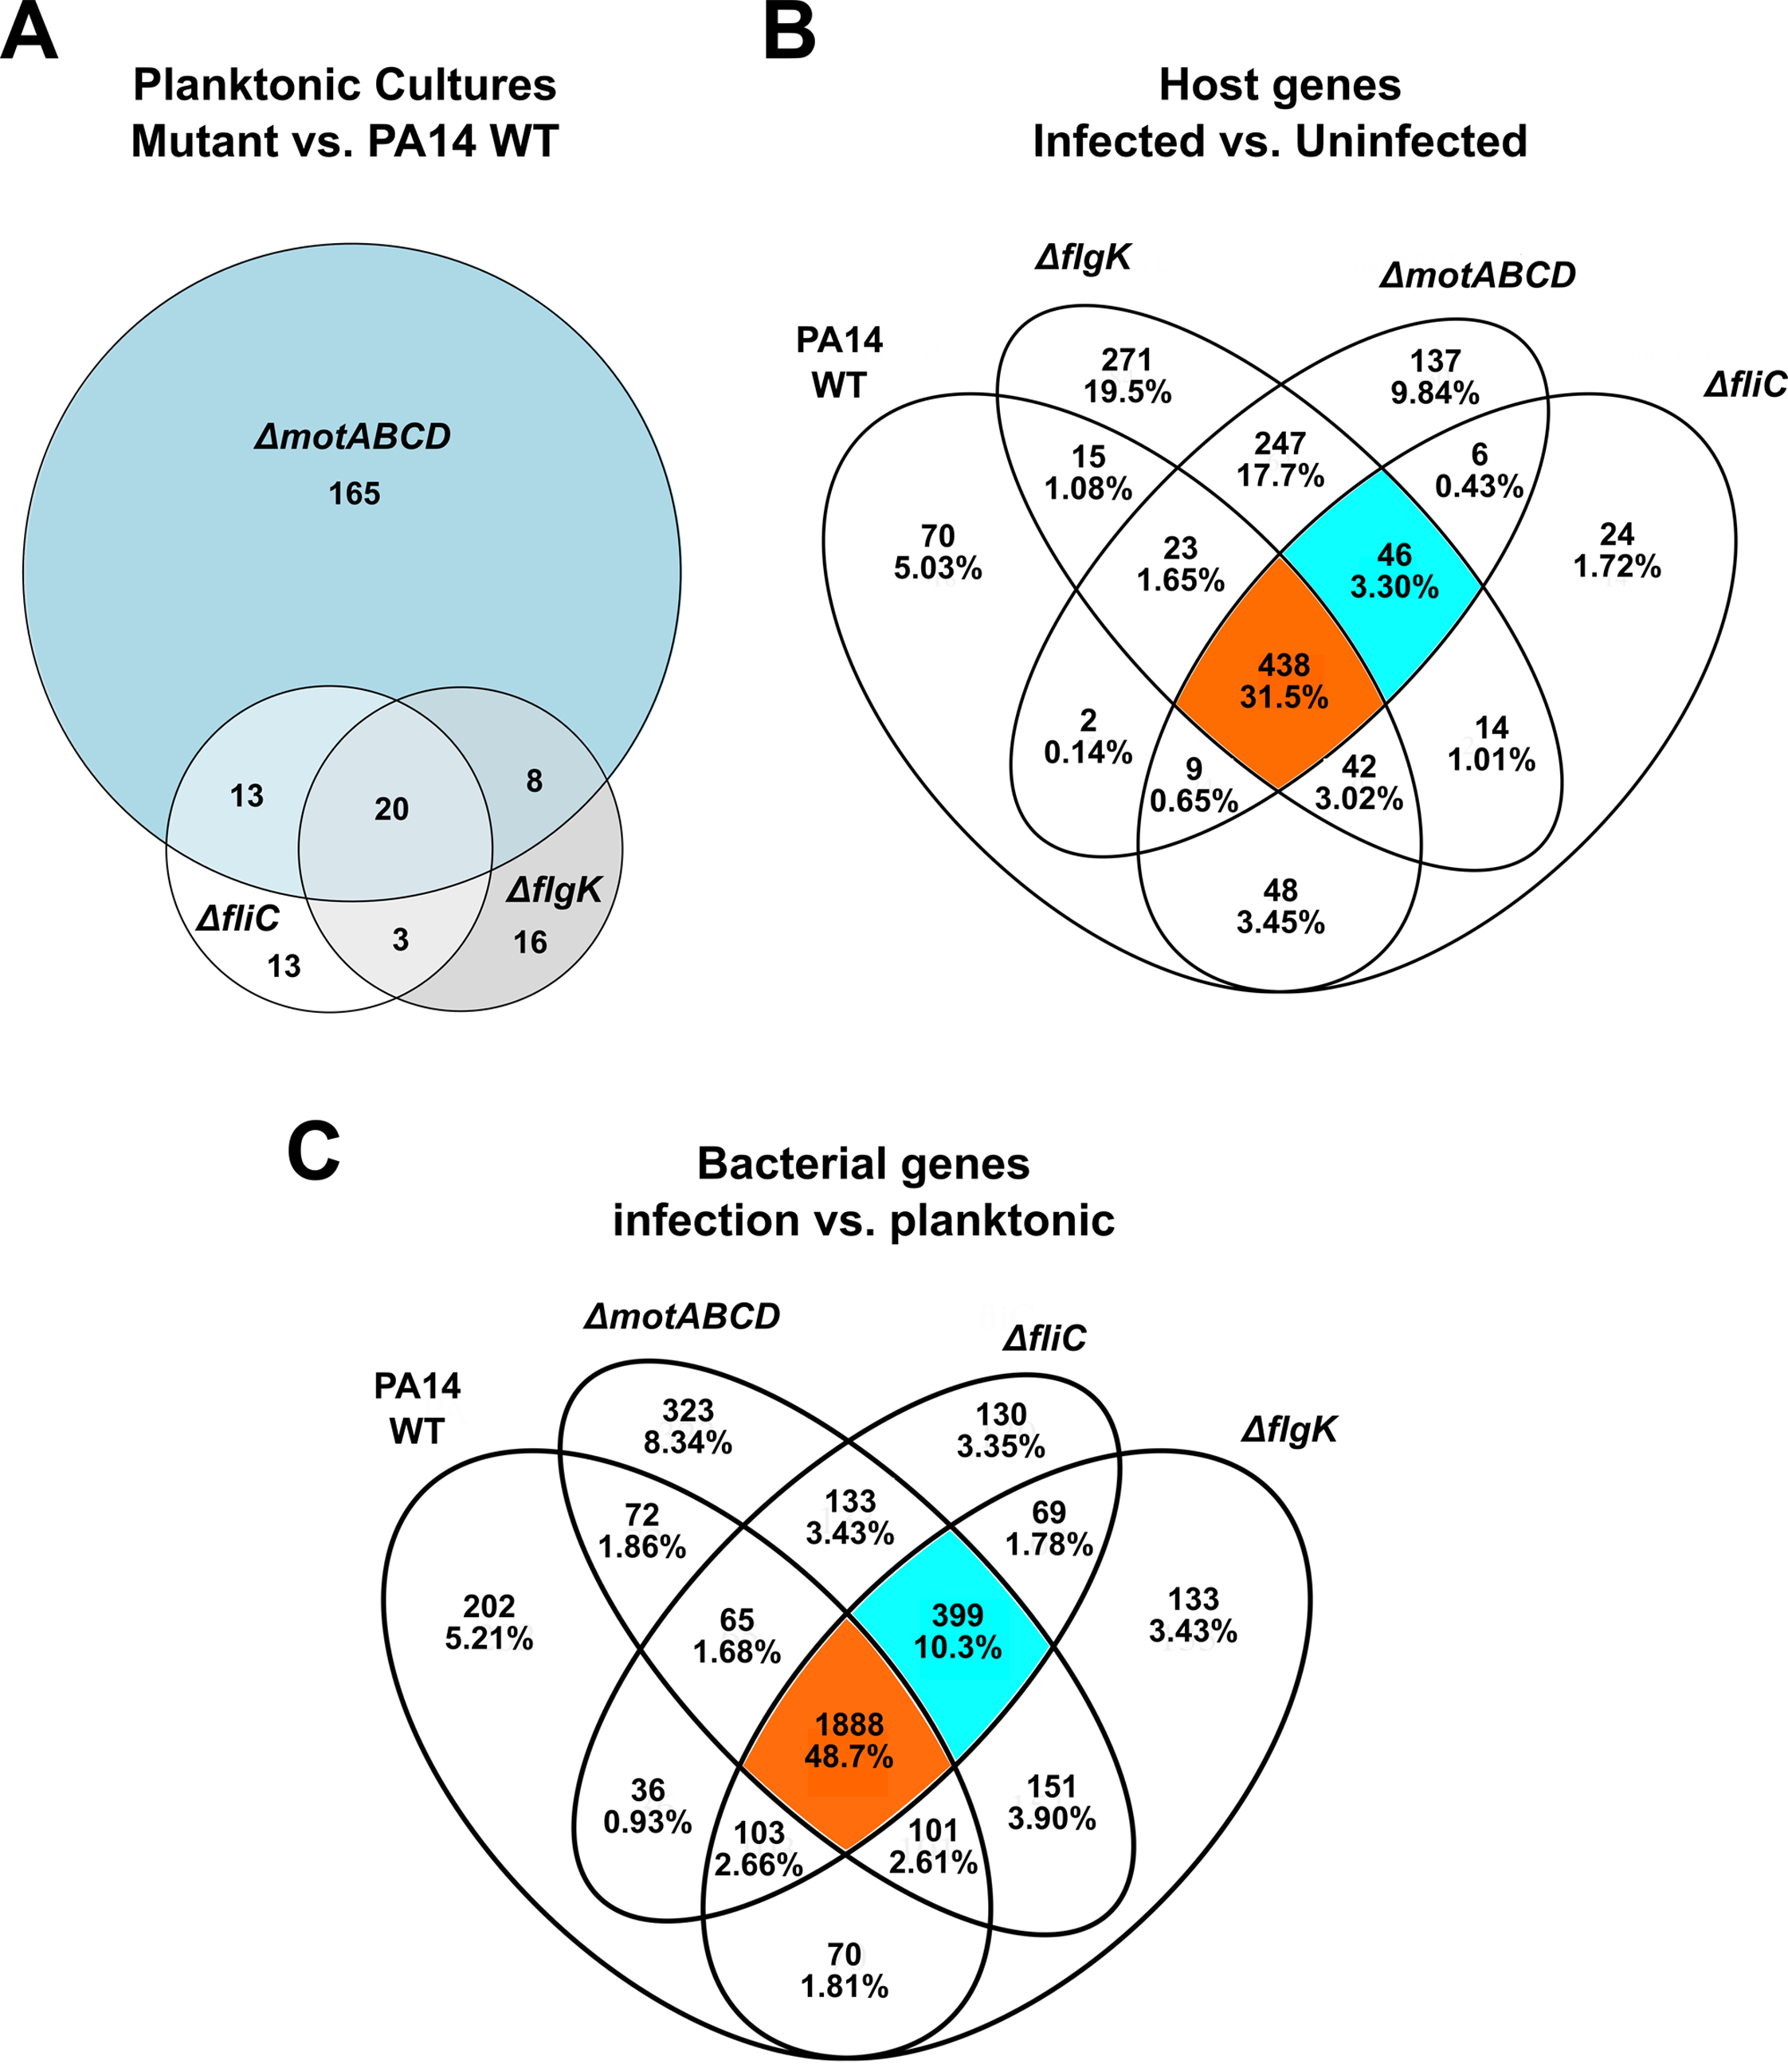

Supplement: supp [file elife-55744-supp-v1.zip › elife_poa_e55744_Figure_3_figure_supplement_1.tif]

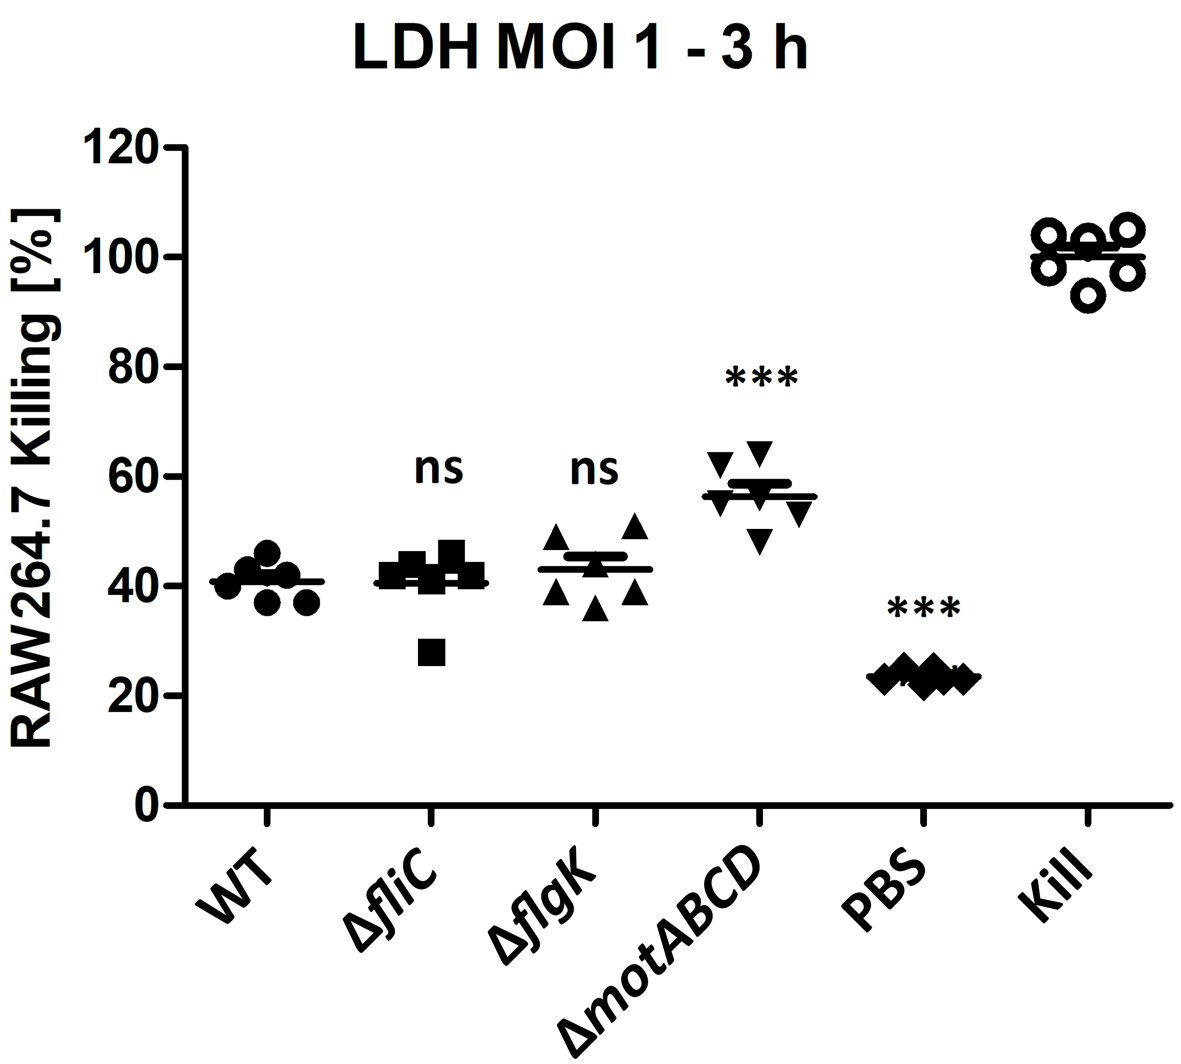

Supplement: supp [file elife-55744-supp-v1.zip › elife_poa_e55744_Figure_3_figure_supplement_2.tif]

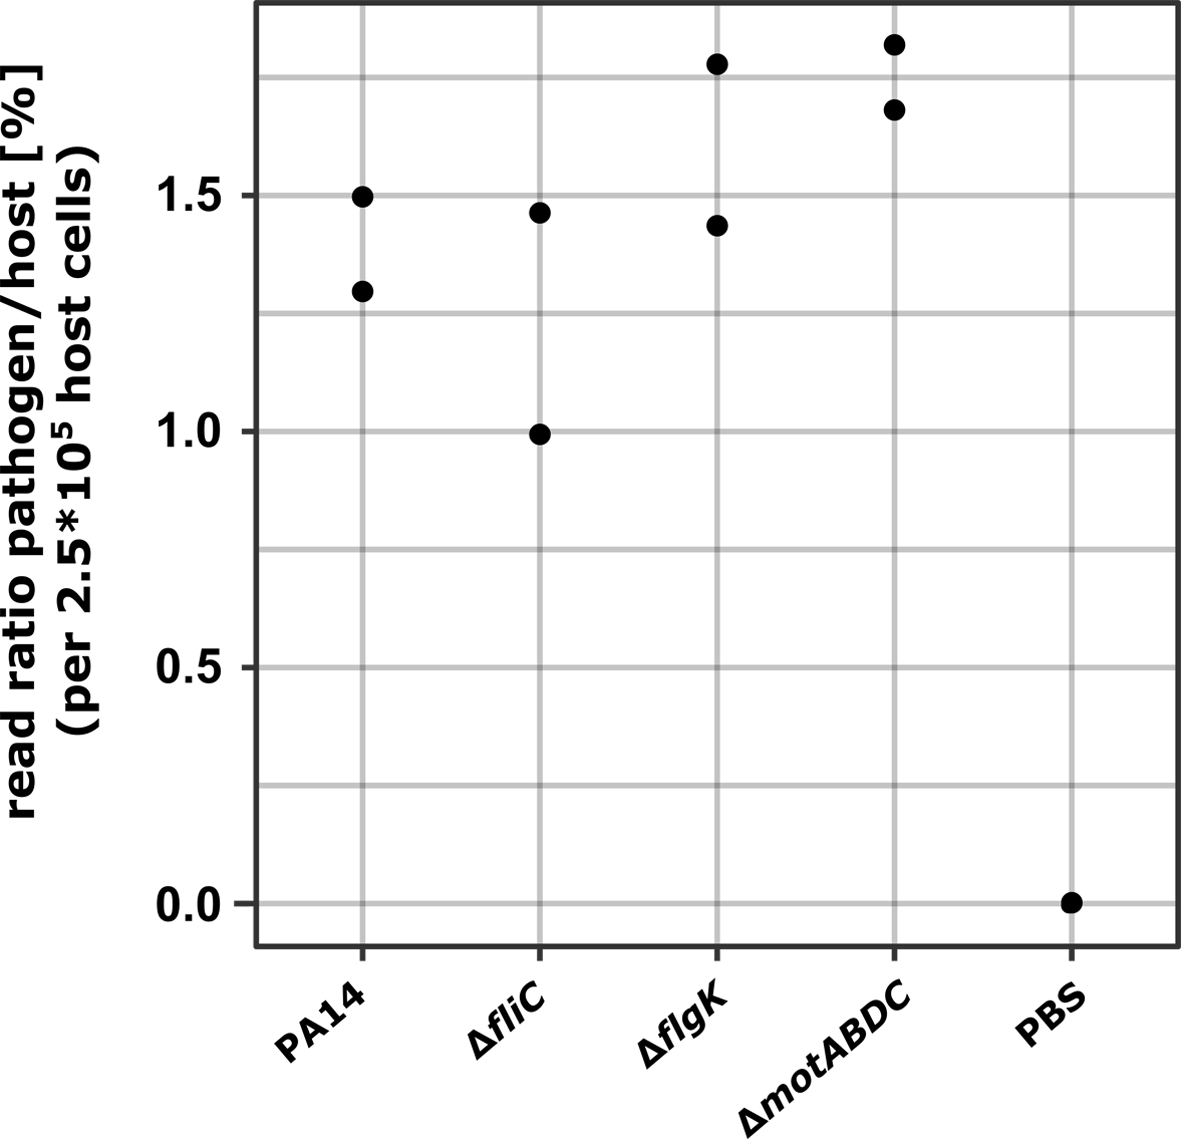

Supplement: supp [file elife-55744-supp-v1.zip › elife_poa_e55744_Figure_3_figure_supplement_3.tif]

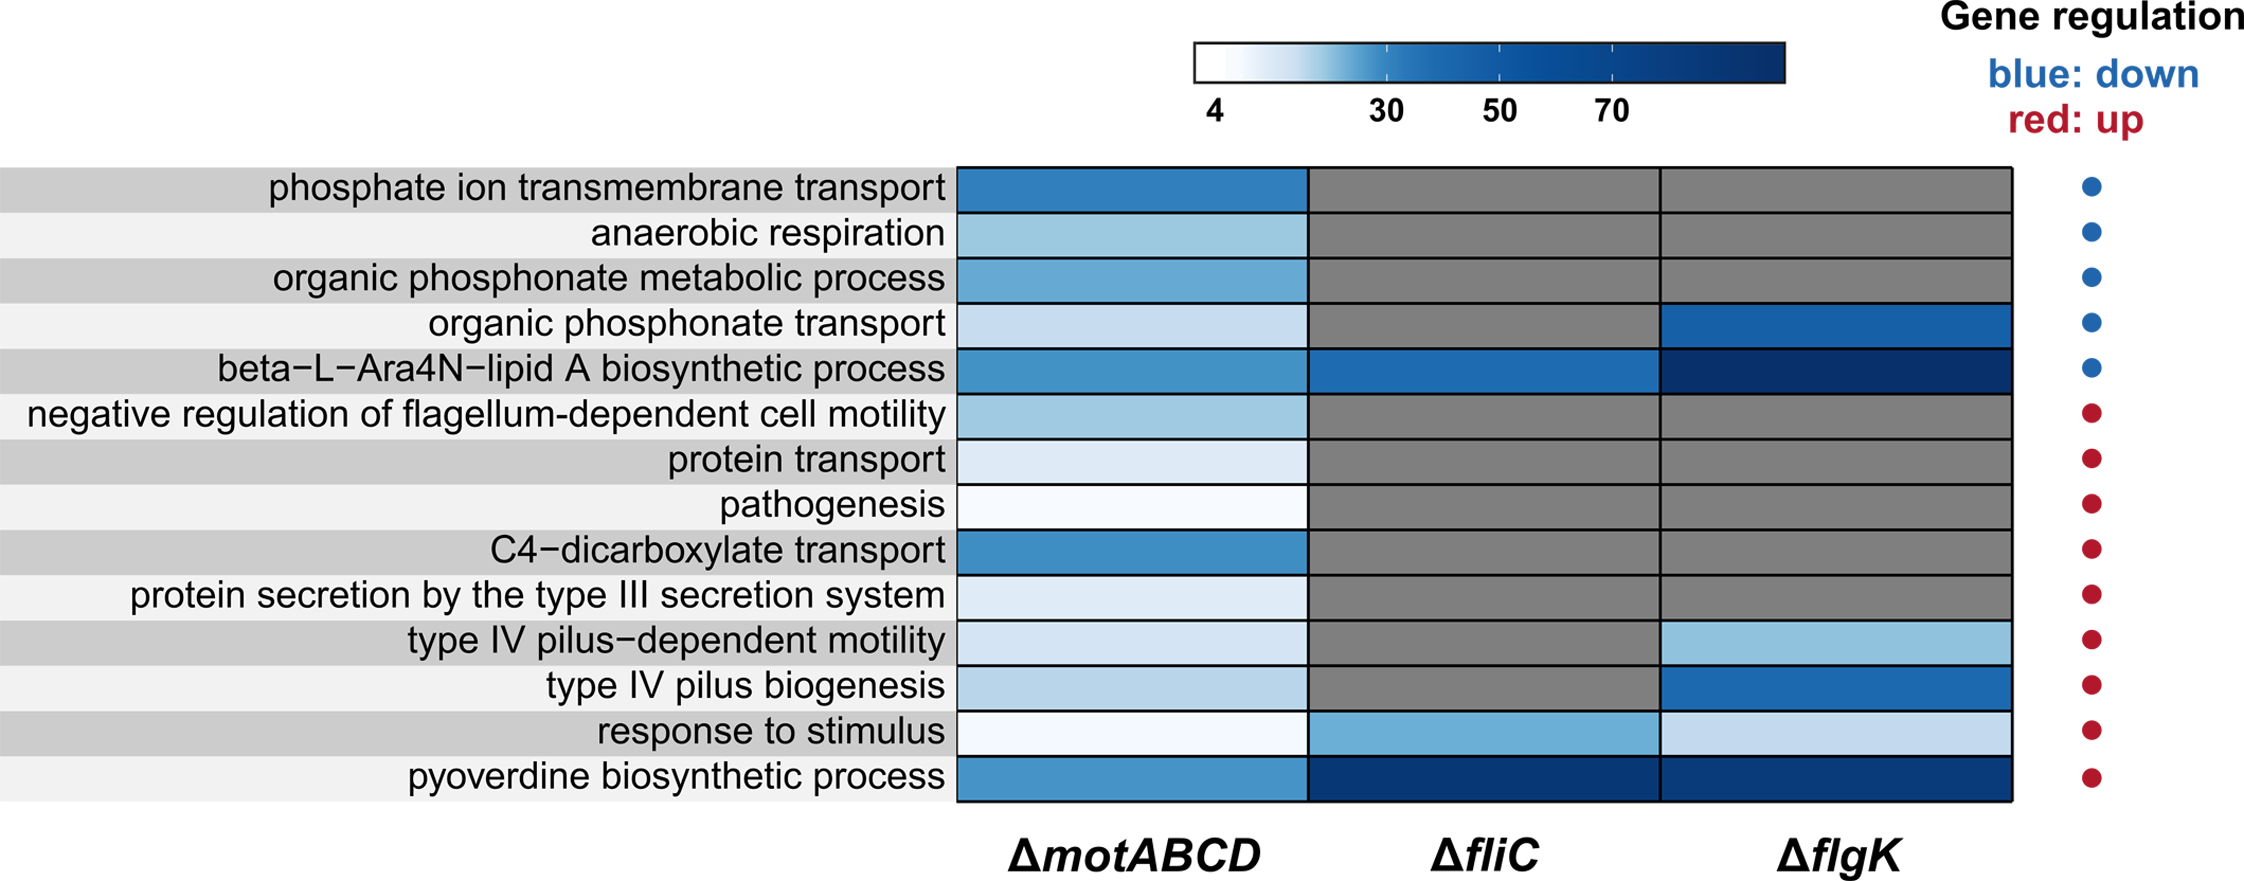

Supplement: supp [file elife-55744-supp-v1.zip › elife_poa_e55744_Figure_3_figure_supplement_4.tif]

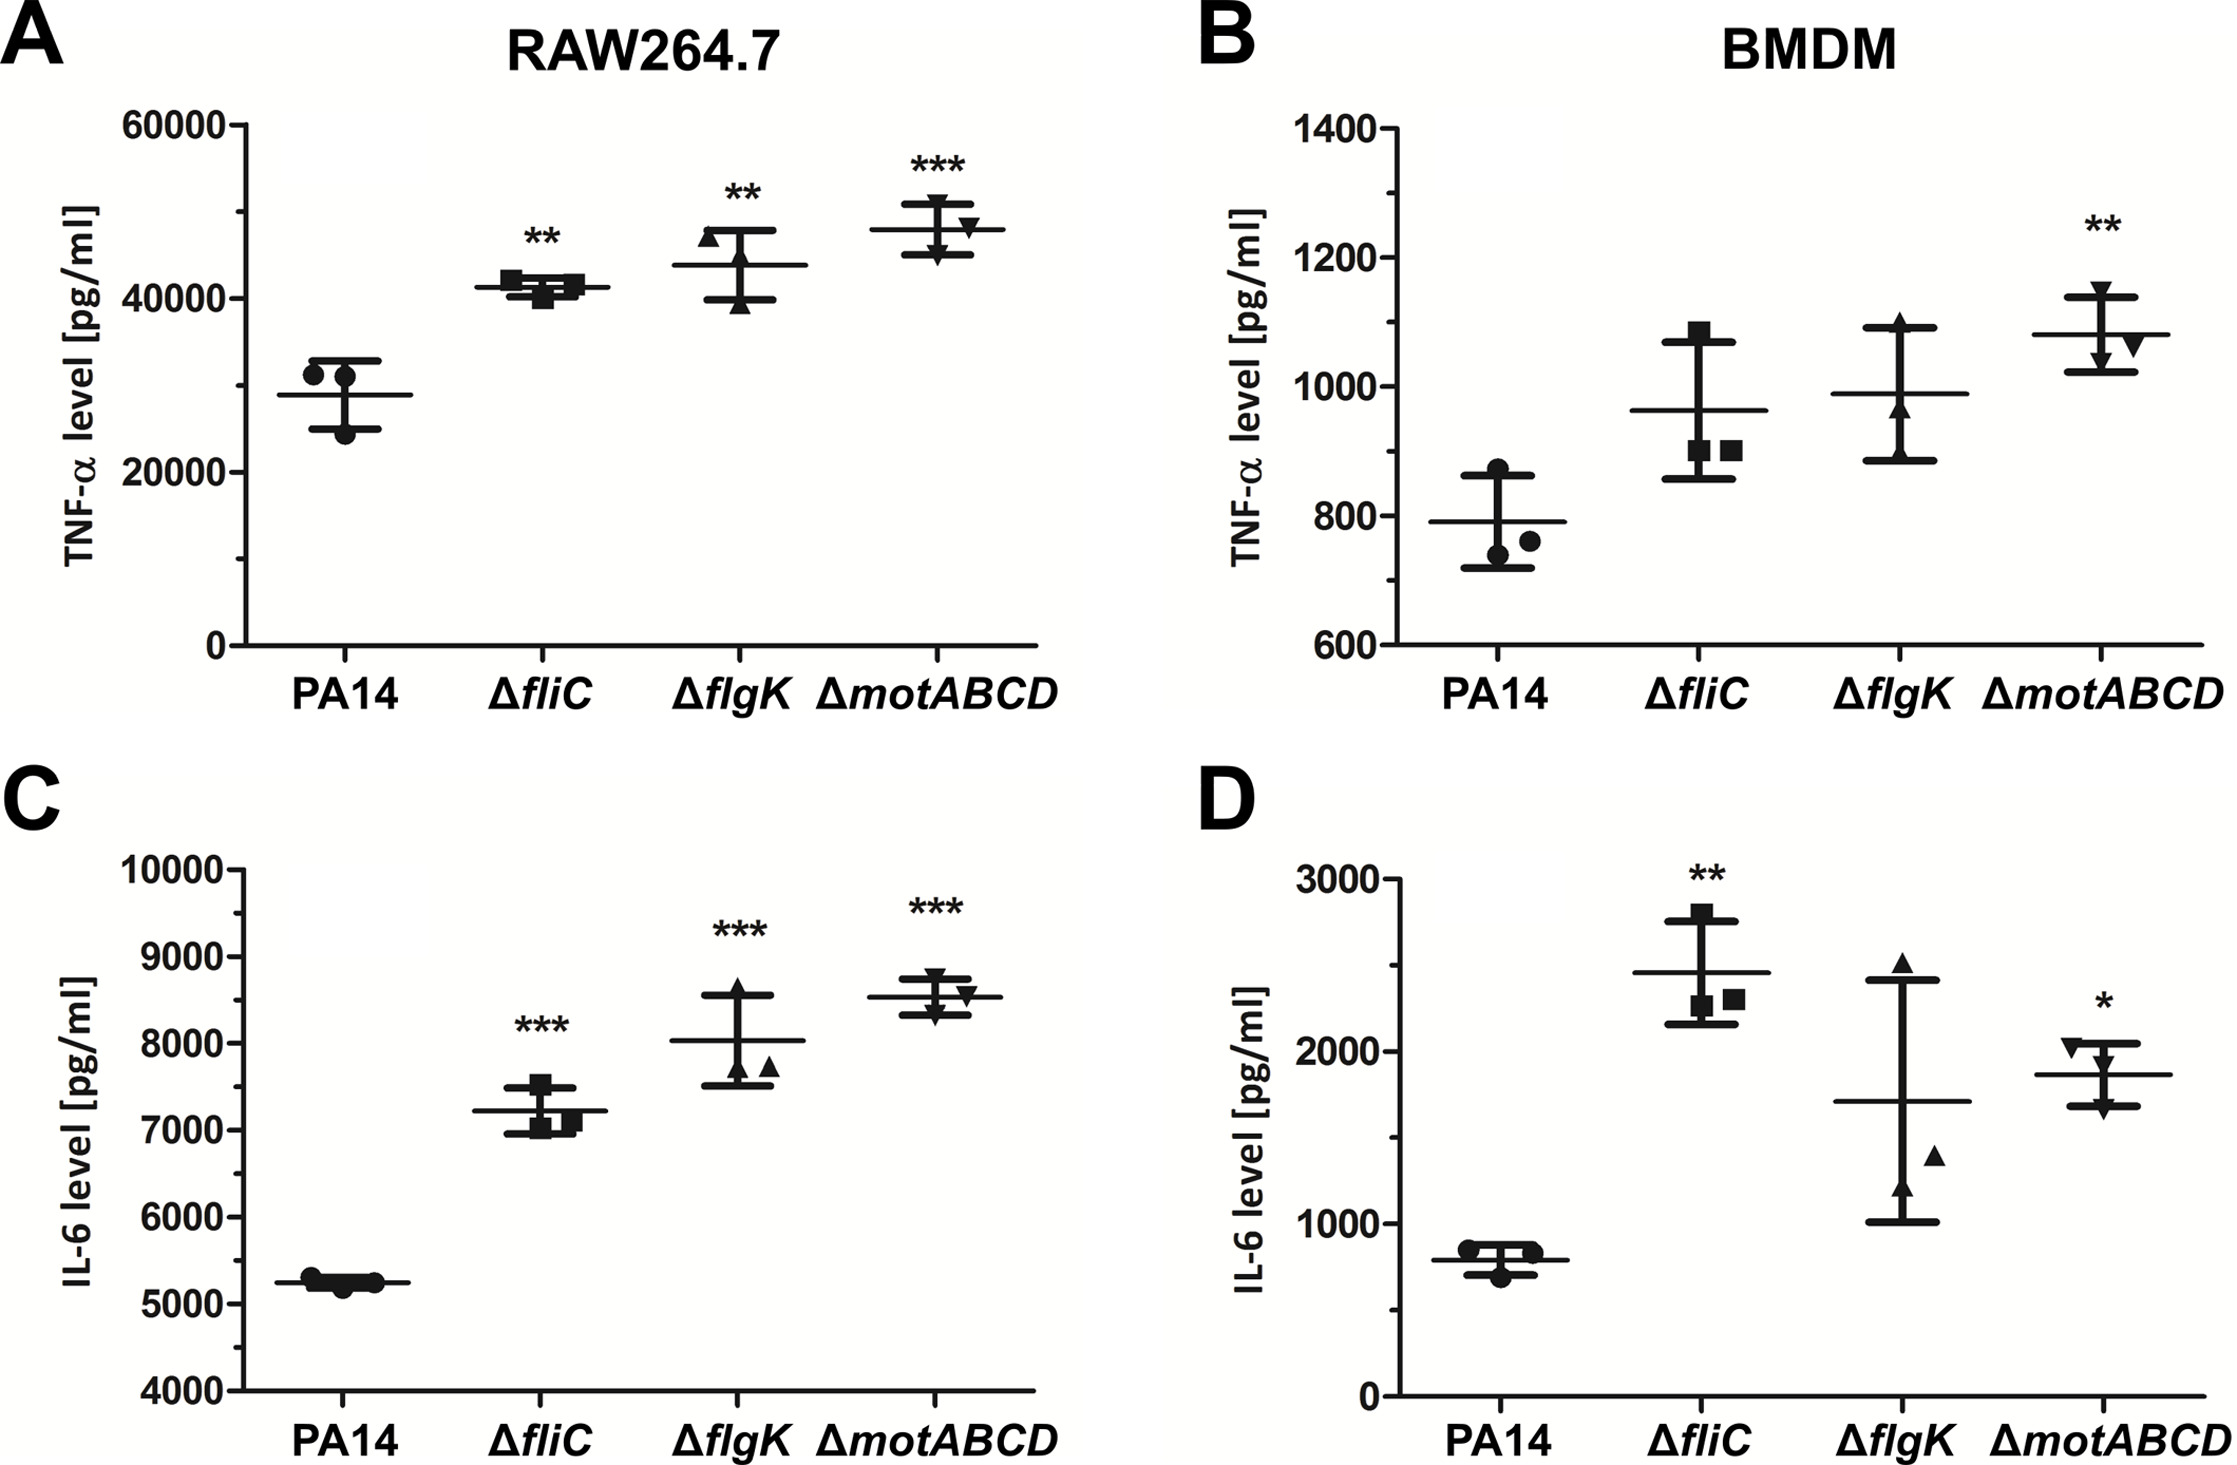

Supplement: supp [file elife-55744-supp-v1.zip › elife_poa_e55744_Figure_4_figure_supplement_1.tif]

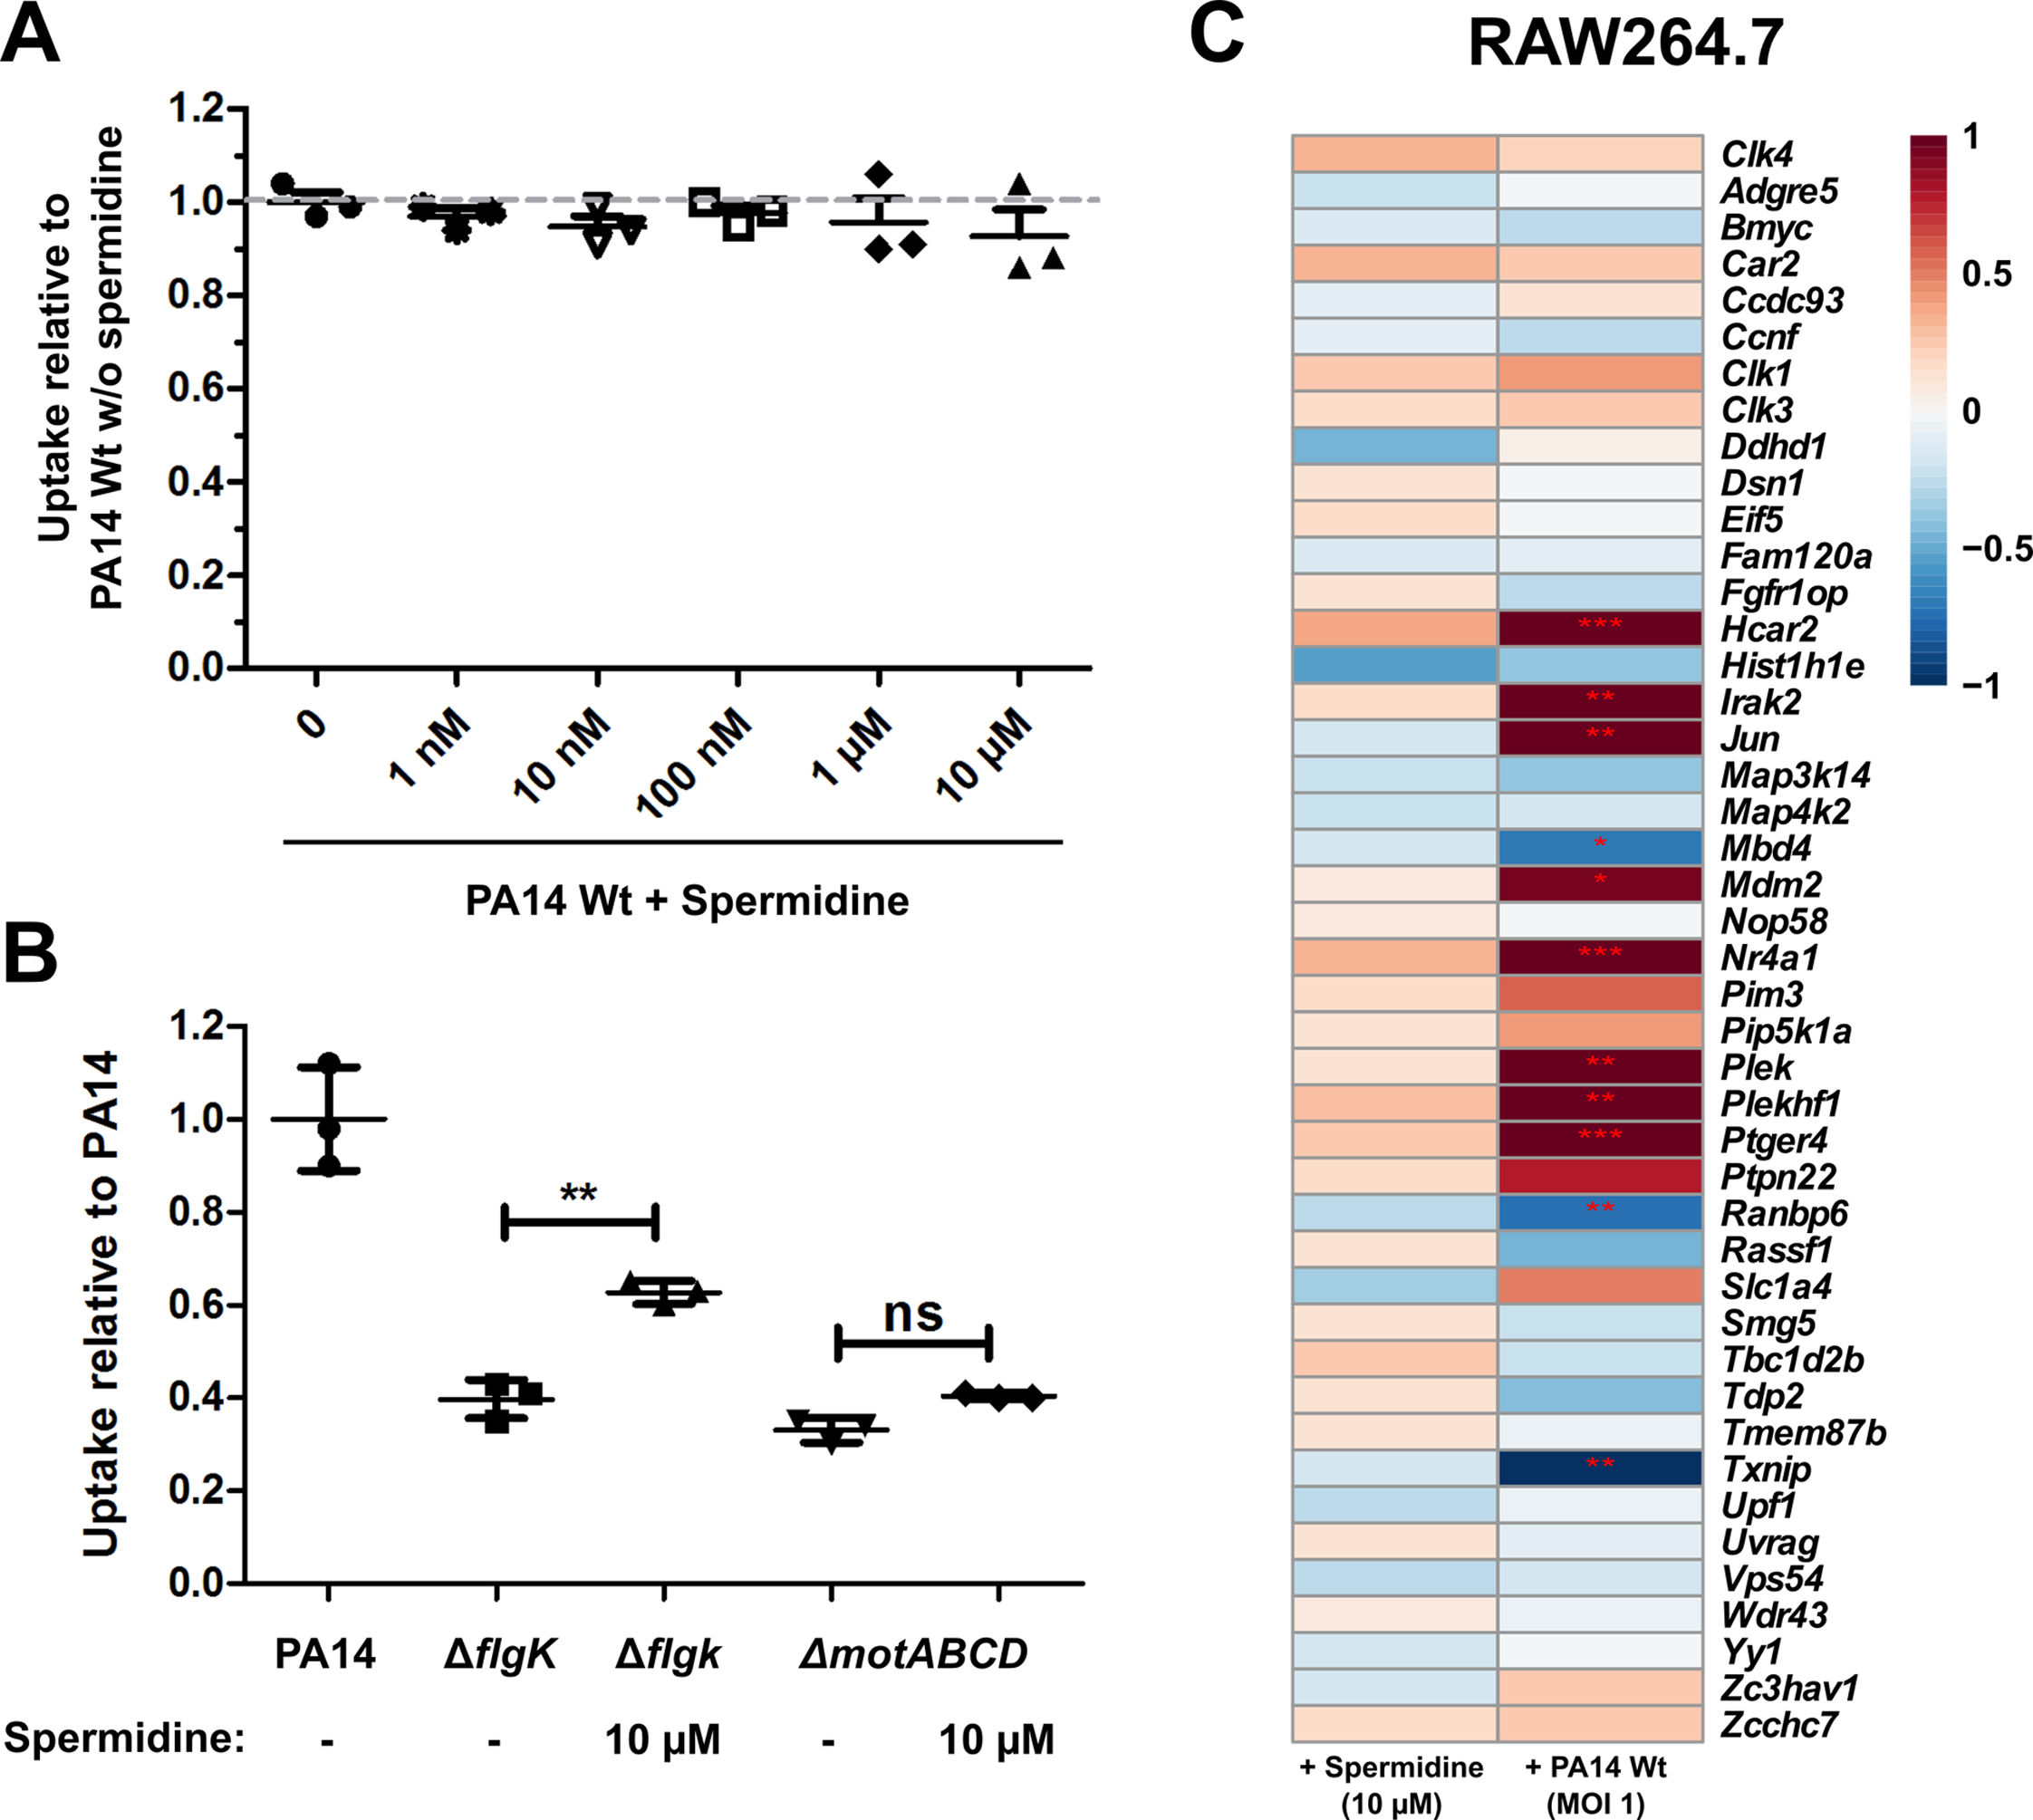

Supplement: supp [file elife-55744-supp-v1.zip › elife_poa_e55744_Figure_6_figure_supplement_1.tif]

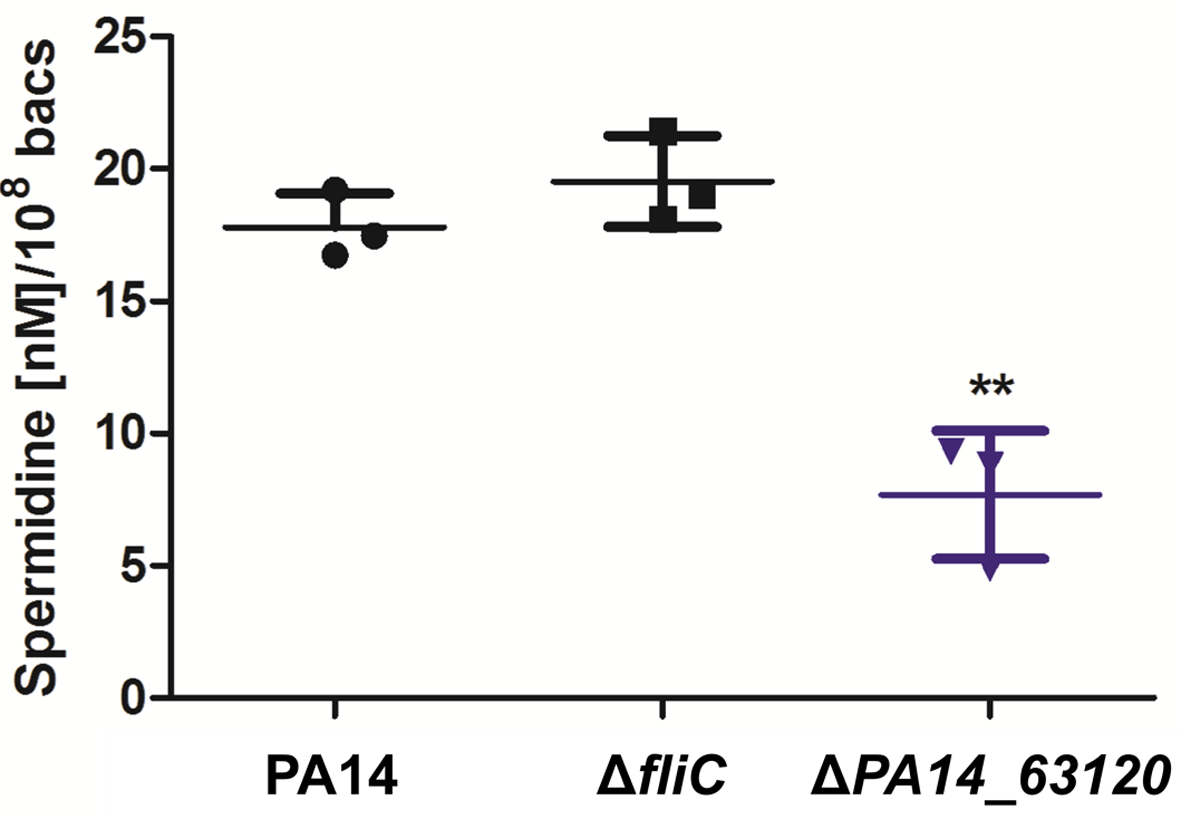

Supplement: supp [file elife-55744-supp-v1.zip › elife_poa_e55744_Figure_7_figure_supplement_1.tif]

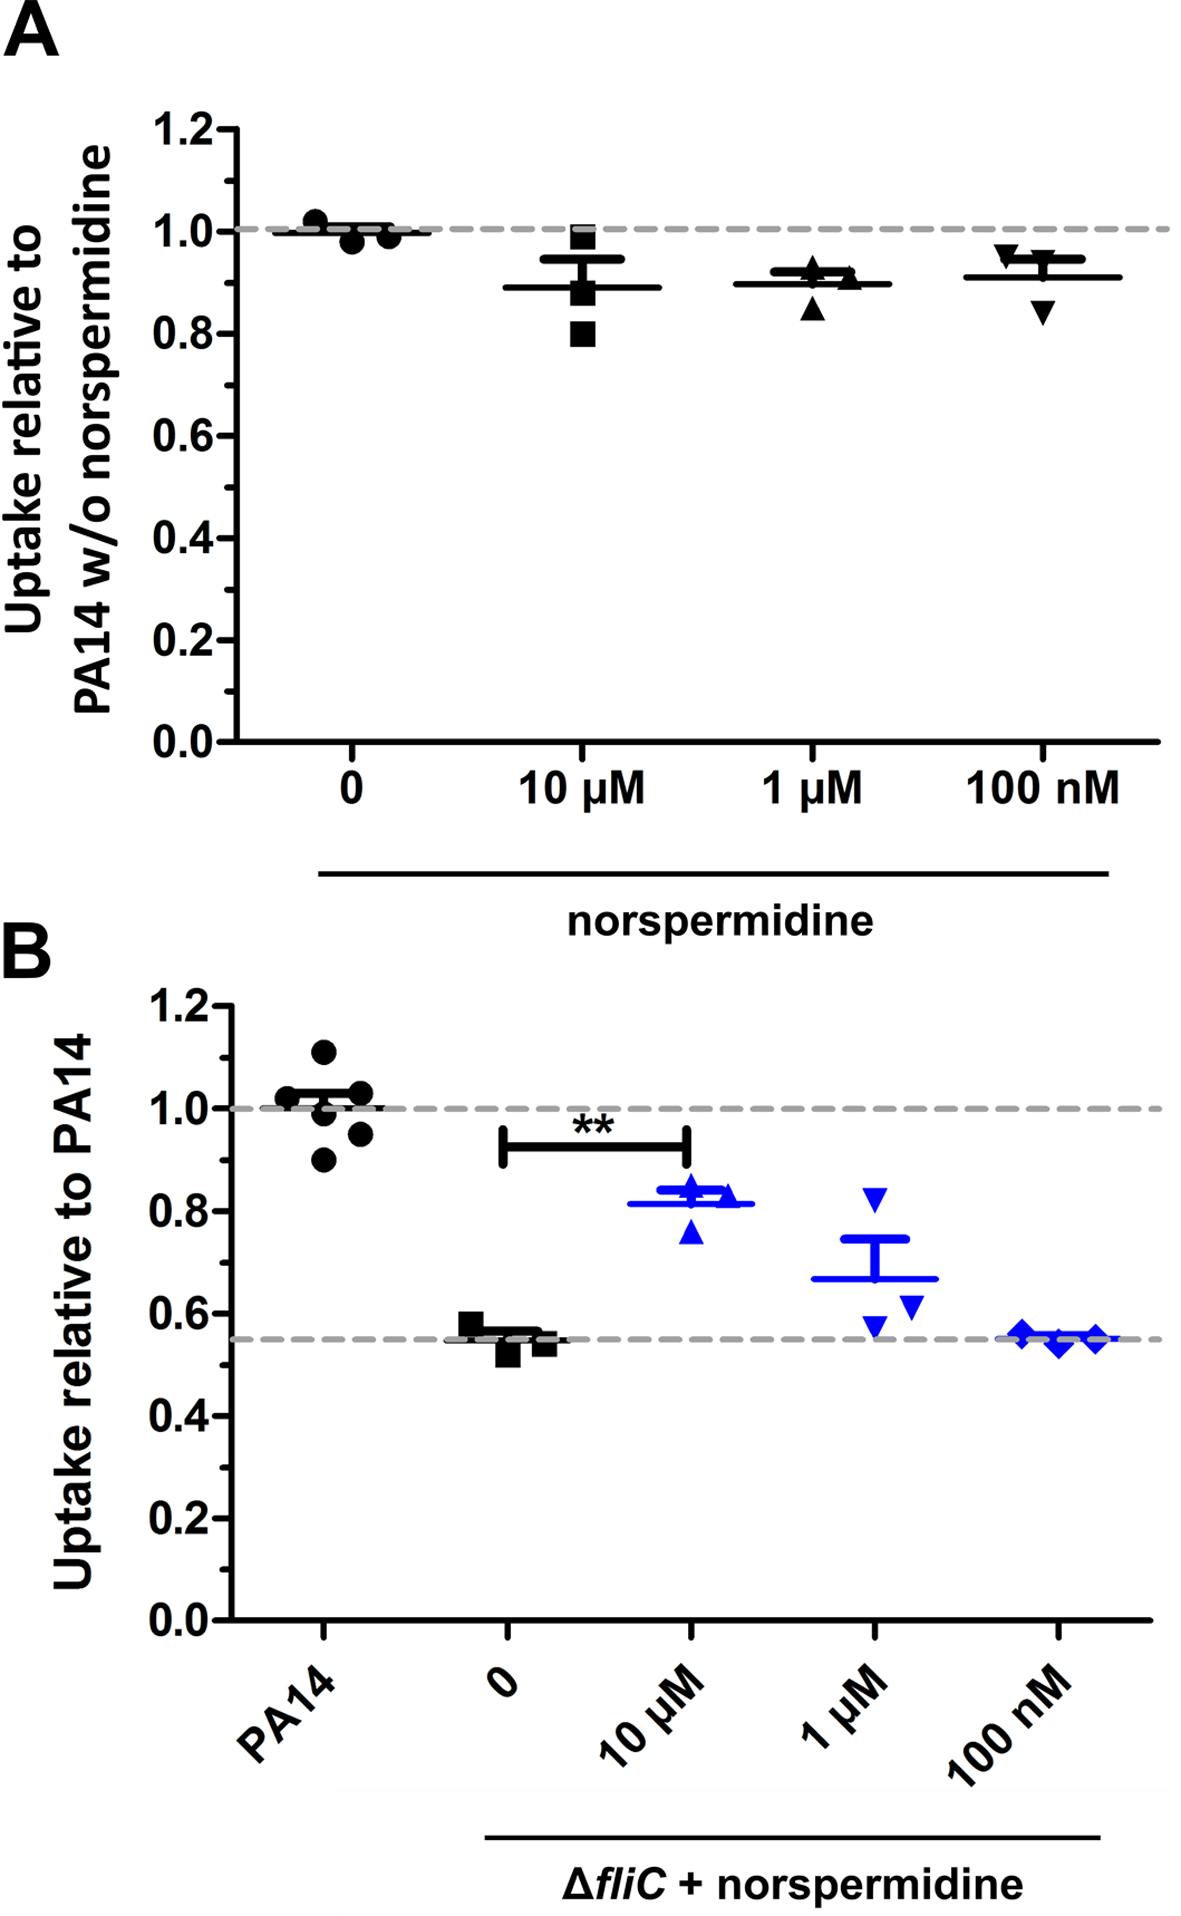

Supplement: supp [file elife-55744-supp-v1.zip › elife_poa_e55744_Figure_7_figure_supplement_2.tif]

**Figure 2\_ Negative Stain**

**CH2677:**

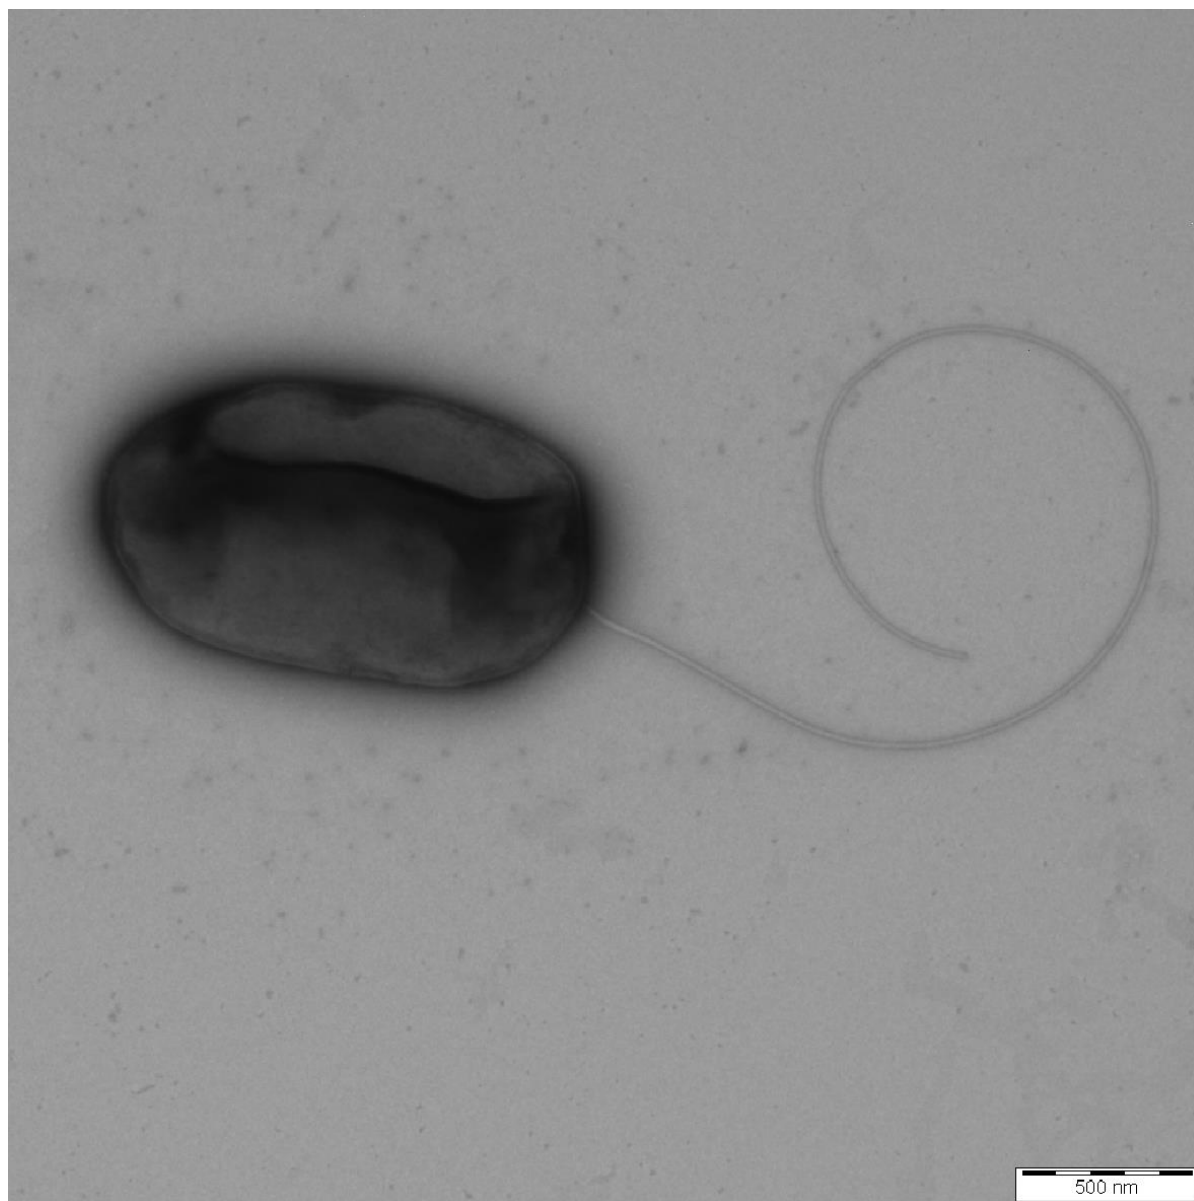

CH3797

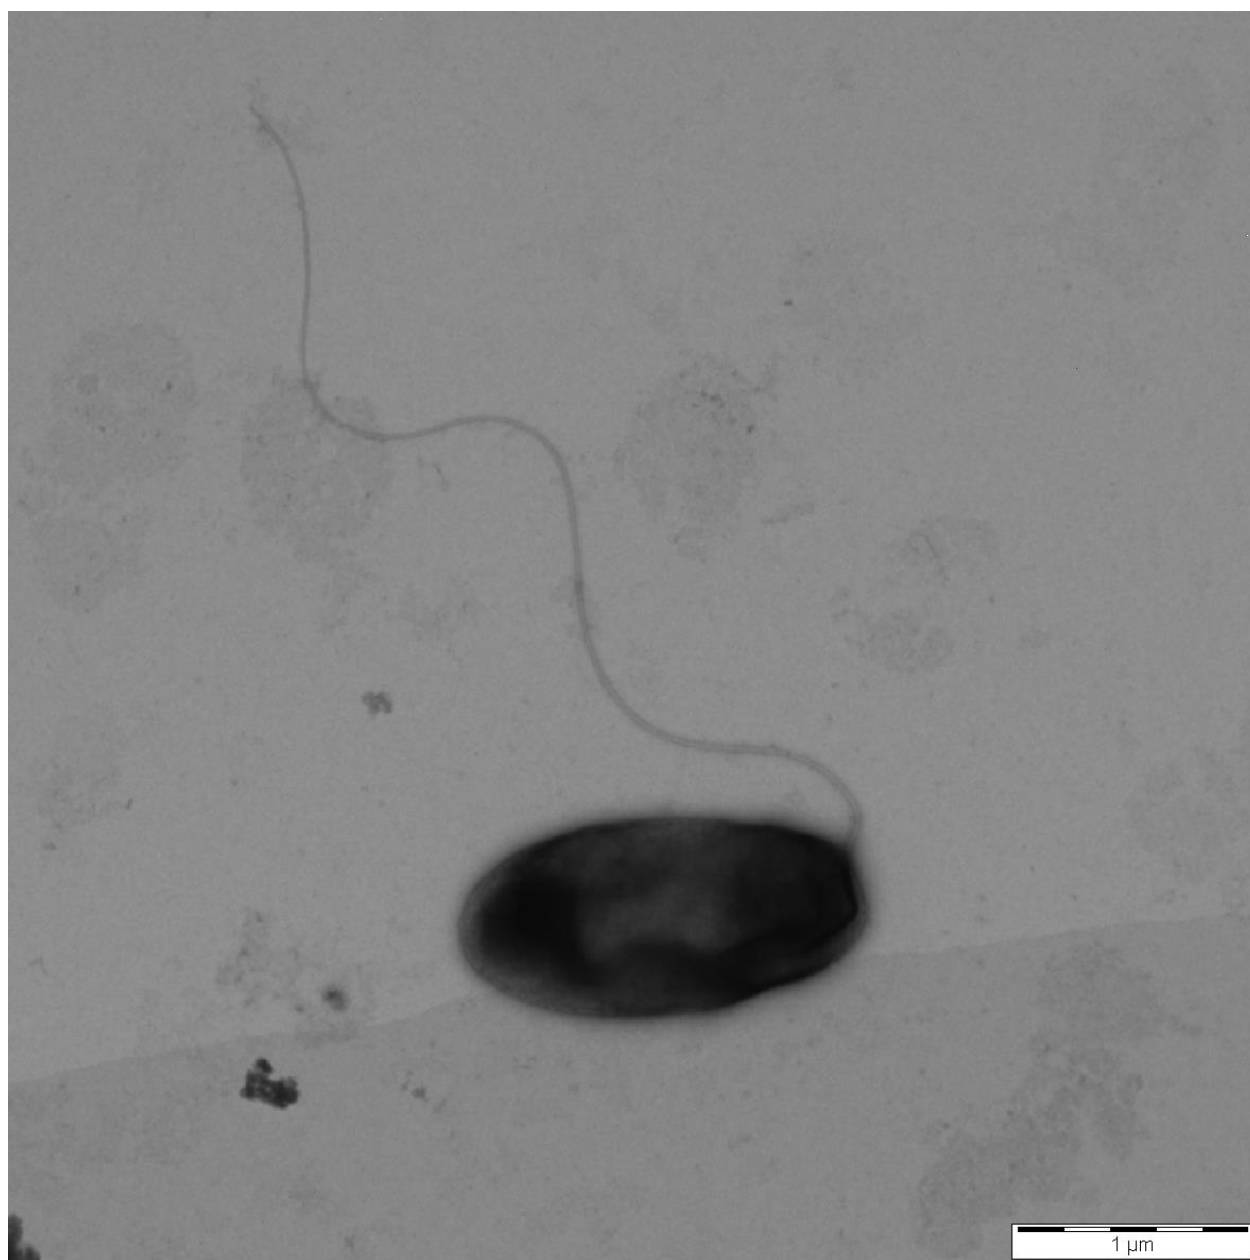

CH5528

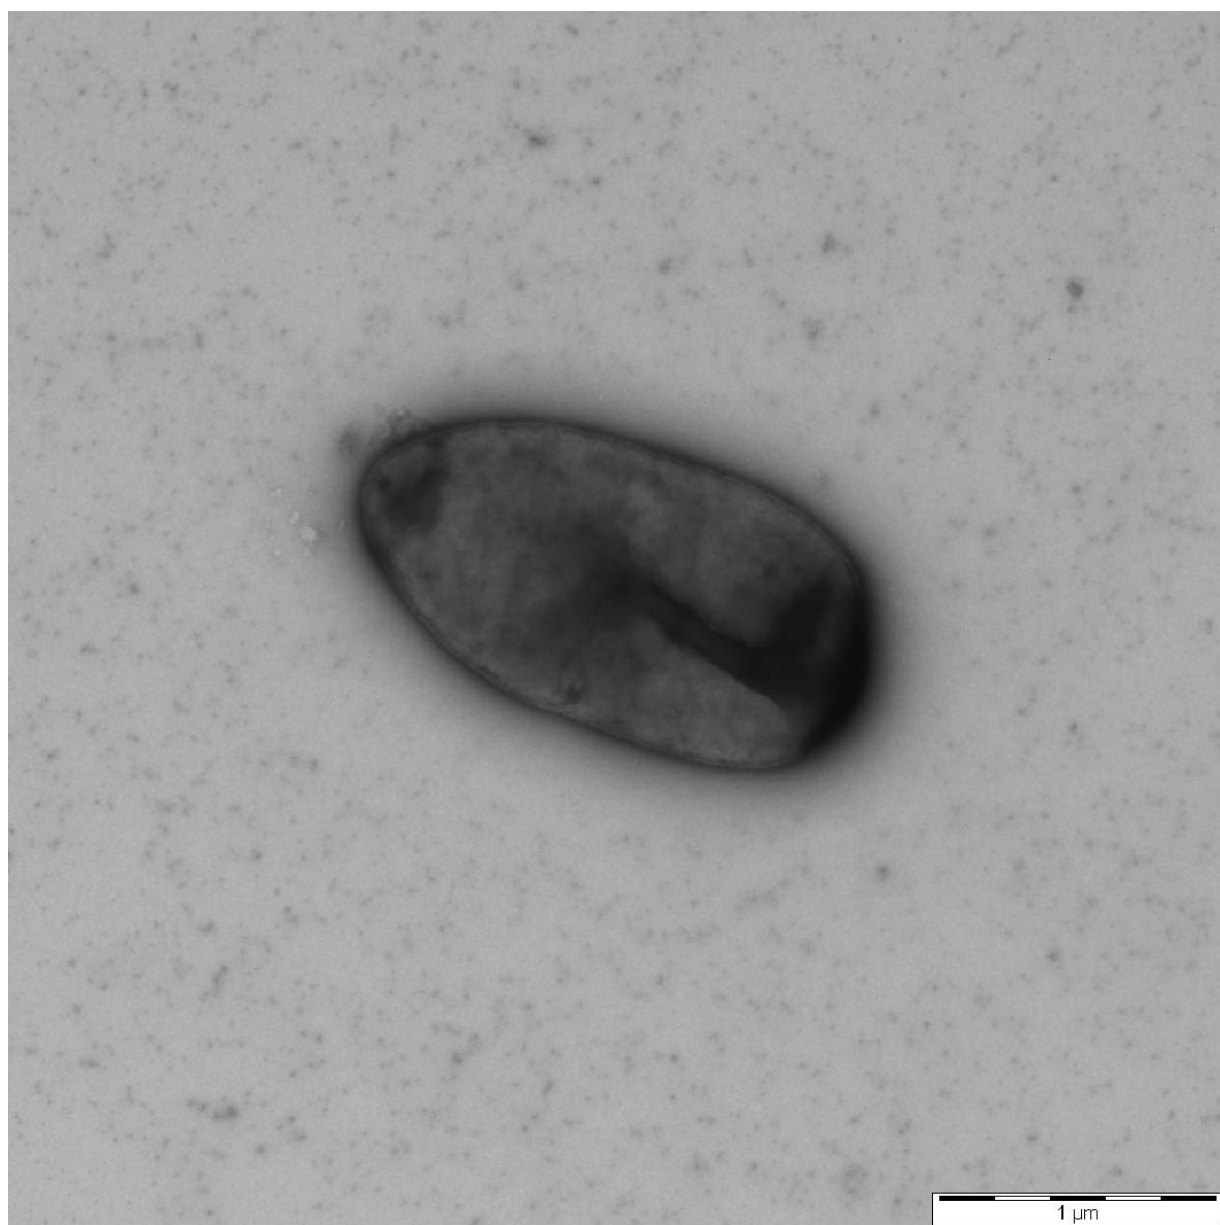

Supplement: supp [file elife-55744-supp-v1.zip › elife_poa_e55744_Figure_2_source_data_1.pdf]
